# Supplementary material
Source: MDPI journal article supplement (https://www.mdpi.com/2304-6740/10/10/166)
Supplement: s1 [file s1]

## Supplementary Data

# Synthesis, Single Crystal X-ray Structure, Spectroscopy and Substitution Behavior of Niobium(V) Complexes Activated by Chloranilate as Bidentate Ligand

Alebel Nibret Belay<sup>1,\*</sup>, Johan Andries Venter<sup>2,\*</sup>, Orbett Teboho Alexander<sup>2</sup> and Andreas Roodt<sup>2,\*</sup>

<sup>1</sup>Department of Chemistry, Bahir Dar University, P.O. Box 79, Bahir Dar, Ethiopia

<sup>2</sup>Department of Chemistry, University of the Free State, P.O. Box 339, Bloemfontein 9300, South Africa

\*Correspondence:: alebel.nibret@bdu.edu.et (A.N.B.), venterja@ufs.ac.za (J.A.V.), aroodta@gmail.com (A.R.)

## INDEX

| No | Item                                                                                                                                                                                                                                                                                                                                                                                                                     | Page |
|----|--------------------------------------------------------------------------------------------------------------------------------------------------------------------------------------------------------------------------------------------------------------------------------------------------------------------------------------------------------------------------------------------------------------------------|------|
| 1  | Table S1. Selected bond lengths within the chloranilic acid/ chloroanilate ligand in (caH <sub>2</sub> )·2H <sub>2</sub> O (2), (Et <sub>4</sub> N) <i>cis</i> -[NbO(ca) <sub>2</sub> (H <sub>2</sub> O)OPPh <sub>3</sub> ]·3H <sub>2</sub> O·THF (5) and (Et <sub>4</sub> N) <sub>4</sub> [Nb <sub>4</sub> O <sub>4</sub> (ca) <sub>2</sub> (μ <sup>2</sup> -O) <sub>2</sub> Cl <sub>8</sub> ]·2CH <sub>3</sub> CN (6). | 3    |
| 2  | Figure S1 ATR Infrared spectrum of caH <sub>2</sub> .H <sub>2</sub> O (2).                                                                                                                                                                                                                                                                                                                                               | 5    |
| 3  | Figure S2 ATR Infrared spectrum of (Et <sub>4</sub> N)[NbCl <sub>6</sub> ] (1)                                                                                                                                                                                                                                                                                                                                           | 6    |
| 4  | Figure S3 ATR Infrared spectrum of (Et <sub>4</sub> N) <i>cis</i> -[NbO(ca) <sub>2</sub> (H <sub>2</sub> O)OPPh <sub>3</sub> ]·3H <sub>2</sub> O·THF (5)                                                                                                                                                                                                                                                                 | 7    |
| 5  | Figure S4 ATR Infrared spectrum of (Et <sub>4</sub> N) <sub>4</sub> [Nb <sub>4</sub> O <sub>4</sub> (ca) <sub>2</sub> (μ <sup>2</sup> -O) <sub>2</sub> Cl <sub>8</sub> ]·2CH <sub>3</sub> CN (6)                                                                                                                                                                                                                         | 8    |
| 6  | Figure S5 H-1 NMR spectrum of caH <sub>2</sub> .H <sub>2</sub> O (2) in DMSO-d <sub>6</sub>                                                                                                                                                                                                                                                                                                                              | 9    |
| 7  | Figure S6 H-1 NMR spectrum of triphenylphosphine oxide in DMSO-d <sub>6</sub>                                                                                                                                                                                                                                                                                                                                            | 10   |
| 8  | Figure S7 H-1 NMR spectrum of (Et <sub>4</sub> N) <i>cis</i> -[NbO(ca) <sub>2</sub> (H <sub>2</sub> O)OPPh <sub>3</sub> ]·3H <sub>2</sub> O·THF (5) in DMSO-d <sub>6</sub>                                                                                                                                                                                                                                               | 11   |
| 9  | Figure S8 H-1 NMR spectrum (Et <sub>4</sub> N) <sub>4</sub> [Nb <sub>4</sub> O <sub>4</sub> (ca) <sub>2</sub> (μ <sup>2</sup> -O) <sub>2</sub> Cl <sub>8</sub> ]·2CH <sub>3</sub> CN (6) in DMSO-d <sub>6</sub>                                                                                                                                                                                                          | 12   |
| 10 | Figure S9 C-13 NMR spectrum of (Et <sub>4</sub> N)[NbCl <sub>6</sub> ] (1) in DMSO-d <sub>6</sub>                                                                                                                                                                                                                                                                                                                        | 13   |
| 11 | Figure S10 C-13 NMR spectrum of (Et <sub>4</sub> N) <i>cis</i> -[NbO(ca) <sub>2</sub> (H <sub>2</sub> O)OPPh <sub>3</sub> ]·3H <sub>2</sub> O·THF (5) in DMSO-d <sub>6</sub>                                                                                                                                                                                                                                             | 14   |
| 12 | Figure S11 C-13 NMR spectrum of (Et <sub>4</sub> N) <sub>4</sub> [Nb <sub>4</sub> O <sub>4</sub> (ca) <sub>2</sub> (μ <sup>2</sup> -O) <sub>2</sub> Cl <sub>8</sub> ]·2CH <sub>3</sub> CN (6) in DMSO-d <sub>6</sub>                                                                                                                                                                                                     | 15   |
| 13 | Figure S12 DIAMOND <sup>10</sup> view of ½(caH <sub>2</sub> )·H <sub>2</sub> O (2) with atom numbering system shown and thermal ellipsoids.                                                                                                                                                                                                                                                                              | 16   |
| 14 | Figure S13 Representation of the plane sin ½(caH <sub>2</sub> )·H <sub>2</sub> O (2).                                                                                                                                                                                                                                                                                                                                    | 16   |
| 15 | Figure S14 Inter-and intramolecular interactions of ½(caH <sub>2</sub> )·H <sub>2</sub> O (2).                                                                                                                                                                                                                                                                                                                           | 17   |
| 16 | Figure S15 Unit cell for ½(caH <sub>2</sub> )·H <sub>2</sub> O (2) showing π-π stacking interactions along the c-axis.                                                                                                                                                                                                                                                                                                   | 17   |
| 17 | Figure S16 Molecular structure of <i>cis</i> -[NbO(ca) <sub>2</sub> (H <sub>2</sub> O)OPPh <sub>3</sub> ] (5a) with atom numbering system shown and the thermal ellipsoids drawn at a 50% probability level.                                                                                                                                                                                                             | 18   |
| 18 | Figure S17 Representation of planes through <i>cis</i> -[NbO(ca) <sub>2</sub> (H <sub>2</sub> O)OPPh <sub>3</sub> ] (5a).                                                                                                                                                                                                                                                                                                | 18   |
| 19 | Figure S18 Representation of <i>cis</i> -[NbO(ca) <sub>2</sub> (H <sub>2</sub> O)OPPh <sub>3</sub> ] (5a) with interplane distances.                                                                                                                                                                                                                                                                                     | 19   |
| 20 | Figure S19 Packing diagram of (Et <sub>4</sub> N) <i>cis</i> -[NbO(ca) <sub>2</sub> (H <sub>2</sub> O)OPPh <sub>3</sub> ]·3H <sub>2</sub> O·THF (5) showing two molecular formula per unit cell along b-axis.                                                                                                                                                                                                            | 19   |
| 21 | Figure S20 Expanded packing diagram of <i>cis</i> -[NbO(ca) <sub>2</sub> (H <sub>2</sub> O)OPPh <sub>3</sub> ] (5a) showing extended wing-like orientation chain head to tail π-π stacking interactions along the b-axis.                                                                                                                                                                                                | 20   |
| 22 | Figure S21 Extended structure of <i>cis</i> -[NbO(ca) <sub>2</sub> (H <sub>2</sub> O)OPPh <sub>3</sub> ] (5a) showing head to tail packing interaction along the b-axis.                                                                                                                                                                                                                                                 | 20   |
| 23 | Figure S22 Extended structure of (Et <sub>4</sub> N) <i>cis</i> -[NbO(ca) <sub>2</sub> (H <sub>2</sub> O)OPPh <sub>3</sub> ]·3H <sub>2</sub> O·THF (5) showing the intra- and intermolecular interactions.                                                                                                                                                                                                               | 21   |

|    |                                                                                                                                                                                                                                                                                                                    |    |
|----|--------------------------------------------------------------------------------------------------------------------------------------------------------------------------------------------------------------------------------------------------------------------------------------------------------------------|----|
| 24 | Figure S23 Extended structure of (Et <sub>4</sub> N) <i>cis</i> -[NbO(ca) <sub>2</sub> (H <sub>2</sub> O)OPPh <sub>3</sub> ].3H <sub>2</sub> O·THF ( <b>5</b> ) showing blue dashed lines, indicating different triangle and v-shaped bifurcated hydrogen-bonds found between its symmetry-generated molecules.    | 21 |
| 25 | Figure S24 Tetranuclear structure of the [Nb <sub>4</sub> O <sub>4</sub> (ca) <sub>2</sub> (μ <sup>2</sup> -O) <sub>2</sub> Cl <sub>8</sub> ] anion of ( <b>6a</b> )                                                                                                                                               | 22 |
| 26 | Figure S25 Tetranuclear structure of (Et <sub>4</sub> N) <sub>4</sub> [Nb <sub>4</sub> O <sub>4</sub> (ca) <sub>2</sub> (μ <sup>2</sup> -O) <sub>2</sub> Cl <sub>8</sub> ].2CH <sub>3</sub> CN ( <b>6</b> )                                                                                                        | 23 |
| 27 | Figure S26 Representation of the planes through [Nb <sub>4</sub> O <sub>4</sub> (ca) <sub>2</sub> (μ <sup>2</sup> -O) <sub>2</sub> Cl <sub>8</sub> ] ( <b>6a</b> ).                                                                                                                                                | 24 |
| 28 | Figure S27 Tetranuclear structure of [Nb <sub>4</sub> O <sub>4</sub> (ca) <sub>2</sub> (μ <sup>2</sup> -O) <sub>2</sub> Cl <sub>8</sub> ] ( <b>6a</b> ) anion of with the thick blue dashed lines indicating π-π stacking interactions between the μ-chloranilate rings.                                           | 25 |
| 29 | Figure S28 Tetranuclear structure of [Nb <sub>4</sub> O <sub>4</sub> (ca) <sub>2</sub> (μ <sup>2</sup> -O) <sub>2</sub> Cl <sub>8</sub> ] ( <b>6a</b> ) with space filling.                                                                                                                                        | 25 |
| 30 | Figure S29 Tetranuclear structure of [Nb <sub>4</sub> O <sub>4</sub> (ca) <sub>2</sub> (μ <sup>2</sup> -O) <sub>2</sub> Cl <sub>8</sub> ] of ( <b>6a</b> ) showing sheet like crystal packing along the b-axis. H-atoms, counter ions and solvated molecules are omitted for clarity.                              | 26 |
| 31 | Figure S30 Tetranuclear structure of (Et <sub>4</sub> N) <sub>4</sub> [Nb <sub>4</sub> O <sub>4</sub> (ca) <sub>2</sub> (μ <sup>2</sup> -O) <sub>2</sub> Cl <sub>8</sub> ].2CH <sub>3</sub> CN ( <b>6</b> ) showing the intra- and intermolecular interactions.                                                    | 27 |
| 32 | Table S2 Atomic coordinates (× 10 <sup>4</sup> ) and equivalent isotropic displacement parameters (Å <sup>2</sup> × 10 <sup>3</sup> ) for ½(caH <sub>2</sub> )·H <sub>2</sub> O ( <b>2</b> ).                                                                                                                      | 28 |
| 33 | Table S3 Bond lengths (Å) and angles (°) for ½(caH <sub>2</sub> )·H <sub>2</sub> O ( <b>2</b> ).                                                                                                                                                                                                                   | 28 |
| 34 | Table S4 Anisotropic displacement parameters (Å <sup>2</sup> × 10 <sup>3</sup> ) for ½(caH <sub>2</sub> )·H <sub>2</sub> O ( <b>2</b> ).                                                                                                                                                                           | 28 |
| 35 | Table S5 Hydrogen coordinates (× 10 <sup>4</sup> ), isotropic displacement parameters (Å <sup>2</sup> × 10 <sup>3</sup> ) and general hydrogen-bond distances (Å) and angles (°) of ½(caH <sub>2</sub> )·H <sub>2</sub> O ( <b>2</b> ).                                                                            | 29 |
| 36 | Table S6 Atomic coordinates (× 10 <sup>4</sup> ) and equivalent isotropic displacement parameters (Å <sup>2</sup> × 10 <sup>3</sup> ) for (Et <sub>4</sub> N) <i>cis</i> -[NbO(ca) <sub>2</sub> (H <sub>2</sub> O)OPPh <sub>3</sub> ].3H <sub>2</sub> O·THF ( <b>5</b> ).                                          | 30 |
| 37 | Table S7 Bond lengths (Å) and angles (°) for (Et <sub>4</sub> N) <i>cis</i> -[NbO(ca) <sub>2</sub> (H <sub>2</sub> O)OPPh <sub>3</sub> ].3H <sub>2</sub> O·THF ( <b>5</b> ).                                                                                                                                       | 32 |
| 38 | Table S8 Anisotropic displacement parameters (Å <sup>2</sup> × 10 <sup>3</sup> ) for (Et <sub>4</sub> N) <i>cis</i> -[NbO(ca) <sub>2</sub> (H <sub>2</sub> O)OPPh <sub>3</sub> ].3H <sub>2</sub> O·THF ( <b>5</b> ).                                                                                               | 35 |
| 39 | Table S9 Hydrogen coordinates (× 10 <sup>4</sup> ) and isotropic displacement parameters (Å <sup>2</sup> × 10 <sup>3</sup> ) for (Et <sub>4</sub> N) <i>cis</i> -[NbO(ca) <sub>2</sub> (H <sub>2</sub> O)OPPh <sub>3</sub> ].3H <sub>2</sub> O·THF ( <b>5</b> ).                                                   | 37 |
| 40 | Table S10 Torsion angles (°) for (Et <sub>4</sub> N) <i>cis</i> -[NbO(ca) <sub>2</sub> (H <sub>2</sub> O)OPPh <sub>3</sub> ].3H <sub>2</sub> O·THF ( <b>5</b> ).                                                                                                                                                   | 39 |
| 41 | Table S11 General hydrogen-bond distances (Å) and angles (°) of (Et <sub>4</sub> N) <i>cis</i> -[NbO(ca) <sub>2</sub> (H <sub>2</sub> O)OPPh <sub>3</sub> ].3H <sub>2</sub> O·THF ( <b>5</b> ).                                                                                                                    | 41 |
| 42 | Table S12 Atomic coordinates (× 10 <sup>4</sup> ) and equivalent isotropic displacement parameters (Å <sup>2</sup> × 10 <sup>3</sup> ) for (Et <sub>4</sub> N) <sub>4</sub> [Nb <sub>4</sub> O <sub>4</sub> (ca) <sub>2</sub> (μ <sup>2</sup> -O) <sub>2</sub> Cl <sub>8</sub> ].2CH <sub>3</sub> CN ( <b>6</b> ). | 42 |
| 43 | Table S13 Bond lengths (Å) and angles (°) for (Et <sub>4</sub> N) <sub>4</sub> [Nb <sub>4</sub> O <sub>4</sub> (ca) <sub>2</sub> (μ <sup>2</sup> -O) <sub>2</sub> Cl <sub>8</sub> ].2CH <sub>3</sub> CN ( <b>6</b> ).                                                                                              | 44 |
| 44 | Table S14 Anisotropic displacement parameters (Å <sup>2</sup> × 10 <sup>3</sup> ) for (Et <sub>4</sub> N) <sub>4</sub> [Nb <sub>4</sub> O <sub>4</sub> (ca) <sub>2</sub> (μ <sup>2</sup> -O) <sub>2</sub> Cl <sub>8</sub> ].2CH <sub>3</sub> CN ( <b>6</b> ).                                                      | 47 |
| 45 | Table S15 Hydrogen coordinates (× 10 <sup>4</sup> ) and isotropic displacement parameters (Å <sup>2</sup> × 10 <sup>3</sup> ) for (Et <sub>4</sub> N) <sub>4</sub> [Nb <sub>4</sub> O <sub>4</sub> (ca) <sub>2</sub> (μ <sup>2</sup> -O) <sub>2</sub> Cl <sub>8</sub> ].2CH <sub>3</sub> CN ( <b>6</b> ).          | 49 |
| 46 | Table S16 Torsion angles (°) for (Et <sub>4</sub> N) <sub>4</sub> [Nb <sub>4</sub> O <sub>4</sub> (ca) <sub>2</sub> (μ <sup>2</sup> -O) <sub>2</sub> Cl <sub>8</sub> ].2CH <sub>3</sub> CN ( <b>6</b> ).                                                                                                           | 51 |
| 47 | Table S17 General hydrogen-bond distances and angles for (Et <sub>4</sub> N) <sub>4</sub> [Nb <sub>4</sub> O <sub>4</sub> (ca) <sub>2</sub> (μ <sup>2</sup> -O) <sub>2</sub> Cl <sub>8</sub> ].2CH <sub>3</sub> CN ( <b>6</b> ).                                                                                   | 53 |
| 48 | Table S18 Temperature and [DMAP] dependence of the <i>pseudo</i> first-order reaction between <i>cis</i> -[NbO(ca) <sub>2</sub> (H <sub>2</sub> O)OPPh <sub>3</sub> ]· ( <b>5a</b> ) and 4-(dimethylamino)pyridine. [Nb] = 1.0 × 10 <sup>-3</sup> M, λ = 430 nm, MeCN.                                             | 54 |
| 49 | Table S19 Substituent dependence of the <i>pseudo</i> first-order reaction between <i>cis</i> -[NbO(ca) <sub>2</sub> (H <sub>2</sub> O)OPPh <sub>3</sub> ]· ( <b>5a</b> ) and pyridine derivative ligands (Py). [Nb] = 1.0 × 10 <sup>-3</sup> M, λ = 430 nm, 31.2 °C, MeCN.                                        | 54 |

**Table S1.** Selected bond lengths within the chloranilic acid/ chloroanilate ligand in (caH<sub>2</sub>)<sub>2</sub>·2H<sub>2</sub>O (**2**), (Et<sub>4</sub>N)*cis*-[NbO(ca)<sub>2</sub>(H<sub>2</sub>O)OPPh<sub>3</sub>]·3H<sub>2</sub>O·THF (**5**) and (Et<sub>4</sub>N)<sub>4</sub>[Nb<sub>4</sub>O<sub>4</sub>(ca)<sub>2</sub>(μ<sup>2</sup>-O)<sub>2</sub>Cl<sub>8</sub>]·2CH<sub>3</sub>CN (**6**).

| <b>Bond lengths (Å)</b>       |           |            |              |            |              |            |
|-------------------------------|-----------|------------|--------------|------------|--------------|------------|
|                               | <b>2</b>  | <b>(°)</b> | <b>5</b>     | <b>(°)</b> | <b>6</b>     | <b>(°)</b> |
| C-O                           | C1-O1     | 1.2256(15) | C1-O1        | 1.316(3)   | C6b-O3b      | 1.269(12)  |
|                               | C1i-O1i   | 1.2256(15) | C2-O2        | 1.314(3)   | C1b-O2b      | 1.237(12)  |
|                               |           |            | C1a-O1a      | 1.278(5)   | C4b-O5b      | 1.248(12)  |
|                               |           |            | C2a-O2a      | 1.288(5)   | C3b-O4b      | 1.279(12)  |
|                               |           | 1.226      |              | 1.299      |              | 1.258      |
| C=O                           | C2-O2     | 1.3173(14) | C4-O4        | 1.301(4)   | C6a-O3a      | 1.241(12)  |
|                               | C2i-O2i   | 1.3173(14) | C5-O5        | 1.285(4)   | C1a-O2a      | 1.278(12)  |
|                               |           |            | C4a-O4a      | 1.227(5)   | C4a-O5a      | 1.278(12)  |
|                               |           |            | C5a-O5a      | 1.224(5)   | C3a-O4a      | 1.253(12)  |
|                               |           | 1.317      |              | 1.259      |              | 1.263      |
| C-Cl                          | C3-Cl1    | 1.7186(12) | C3-Cl1       | 1.799(2)   | C2b-Cl3b     | 1.747(10)  |
|                               | C3i-Cl1i  | 1.7186(12) | C3a-Cl1a     | 1.725(5)   | C5b-Cl4b     | 1.724(10)  |
|                               |           |            | C6-Cl2       | 1.782(2)   | C2a-Cl3a     | 1.713(10)  |
|                               |           |            | C6a-Cl2a     | 1.728(4)   | C5a-Cl4a     | 1.728(10)  |
|                               |           | 1.719      |              | 1.759      |              | 1.728      |
| <b>Bond angles (°)</b>        |           |            |              |            |              |            |
|                               | <b>2</b>  | <b>(°)</b> | <b>5</b>     | <b>(°)</b> | <b>6</b>     | <b>(°)</b> |
| O-C- <u>C</u> <sub>MC</sub>   | O1 C1 C2  | 118.15(11) | O1-C1-C2     | 115.2(2)   | O3a-C6a-C1a  | 115.9(8)   |
|                               |           |            | O1a-C1a-C2a  | 113.7(3)   | O3b-C6b-C1b  | 114.7(8)   |
|                               |           |            | O2-C2-C1     | 114.5(2)   | O2a-C1a-C6a  | 115.1(8)   |
|                               |           |            | O2a-C2a-C1a  | 113.2(3)   | O2b-C1b-C6b  | 115.5(8)   |
|                               |           |            | O5-C5-C4     | 119.7(2)   | O5a-C4a-C3a  | 116.3(8)   |
|                               |           |            | O5a-C5a-C4a  | 116.3(4)   | O5b-C4b-C3b  | 116.5(9)   |
|                               |           |            | O4-C4-C5     | 120.8(2)   | O4a-C3a-C4a  | 114.7(8)   |
|                               |           |            | O4a-C4a-C5a  | 117.4(4)   | O4b-C3b-C4b  | 114.2(9)   |
|                               |           |            |              | 116.35     |              | 115.36     |
| O-C- <u>C</u> <sub>Out</sub>  | O2 C2 C3  | 122.05(11) | O2-C2-C3     | 125.3(2)   | O2a-C1a-C2a  | 125.5(9)   |
|                               |           |            | O2a-C2a-C3a  | 125.6(4)   | O2b-C1b-C2b  | 125.8(9)   |
|                               |           |            | O1-C1-C6     | 124.1(2)   | O5b-C4b-C5b  | 123.6(10)  |
|                               |           |            | O1a-C1a-C6a  | 125.9(4)   | O5a-C4a-C5a  | 124.4(9)   |
|                               |           |            | O4-C4-C3     | 118.6(2)   | O4a-C3a-C2a  | 124.7(9)   |
|                               |           |            | O4a-C4a-C3a  | 124.6(4)   | O4b-C3b-C2b  | 127.2(10)  |
|                               |           |            | O5-C5-C6     | 120.2(2)   | O3a-C6a-C5a  | 124.9(9)   |
|                               |           |            | O5a-C5a-C6a  | 125.6(4)   | O3b-C6b-C5b  | 126.0(9)   |
|                               |           |            |              | 123.74     |              | 125.26     |
| C-C- <u>Cl</u> <sub>Out</sub> | C2 C3 Cl1 | 121.12(9)  | C1a-C6a-Cl2a | 120.4(3)   | C6b-C5b-Cl4b | 120.2(8)   |
|                               |           |            | C1-C6-Cl2    | 121.02(15) | C6a-C5a-Cl4a | 117.8(7)   |
|                               |           |            | C2-C3-Cl1    | 117.48(15) | C1a-C2a-Cl3a | 120.2(8)   |
|                               |           |            | C2a-C3a-Cl1a | 120.7(3)   | C1b-C2b-Cl3b | 118.1(7)   |
|                               |           |            | C4-C3-Cl1    | 122.47(15) | C3b-C2b-Cl3b | 118.9(8)   |
|                               |           |            | C4a-C3a-Cl1a | 118.4(3)   | C3a-C2a-Cl3a | 119.5(7)   |
|                               |           |            | C5-C6-Cl2    | 121.02(15) | C4a-C5a-Cl4a | 121.0(7)   |
|                               |           |            | C5a-C6a-Cl2a | 118.1(3)   | C4b-C5b-Cl4b | 119.1(8)   |
|                               |           |            |              | 119.95     |              | 119.35     |
| C-C-C                         | C3 C2 C1  | 120.18(10) | C3-C4-C5     | 120.0      | C2b-C3b-C4b  | 118.6(9)   |
|                               |           |            | C3a-C4a-C5a  | 118.1(4)   | C2a-C3a-C4a  | 120.5(8)   |

|             |          |             |          |
|-------------|----------|-------------|----------|
| C6-C5-C4    | 120.0    | C5a-C4a-C3a | 119.3(8) |
| C6a-C5a-C4a | 118.1(4) | C5b-C4b-C3b | 119.8(9) |
| C6-C1-C2    | 120.0    | C5a-C6a-C1a | 119.2(8) |
| C6a-C1a-C2a | 120.4(4) | C5b-C6b-C1b | 119.3(9) |
| C1-C6-C5    | 120.0    | C6b-C5b-C4b | 120.6(9) |
| C1a-C6a-C5a | 121.4(4) | C4a-C5a-C6a | 121.2(9) |
| C2-C3-C4    | 120.0    | C1a-C2a-C3a | 120.2(9) |
| C2a-C3a-C4a | 120.9(4) | C3b-C2b-C1b | 122.9(9) |
| C3-C2-C1    | 120.0    | C2a-C1a-C6a | 119.4(8) |
| C3a-C2a-C1a | 121.1(4) | C2b-C1b-C6b | 118.7(9) |
|             | 120.0    |             | 119.98   |

---

# ATR IR of $\text{CaH}_2 \cdot 2\text{H}_2\text{O}$ (**2**)

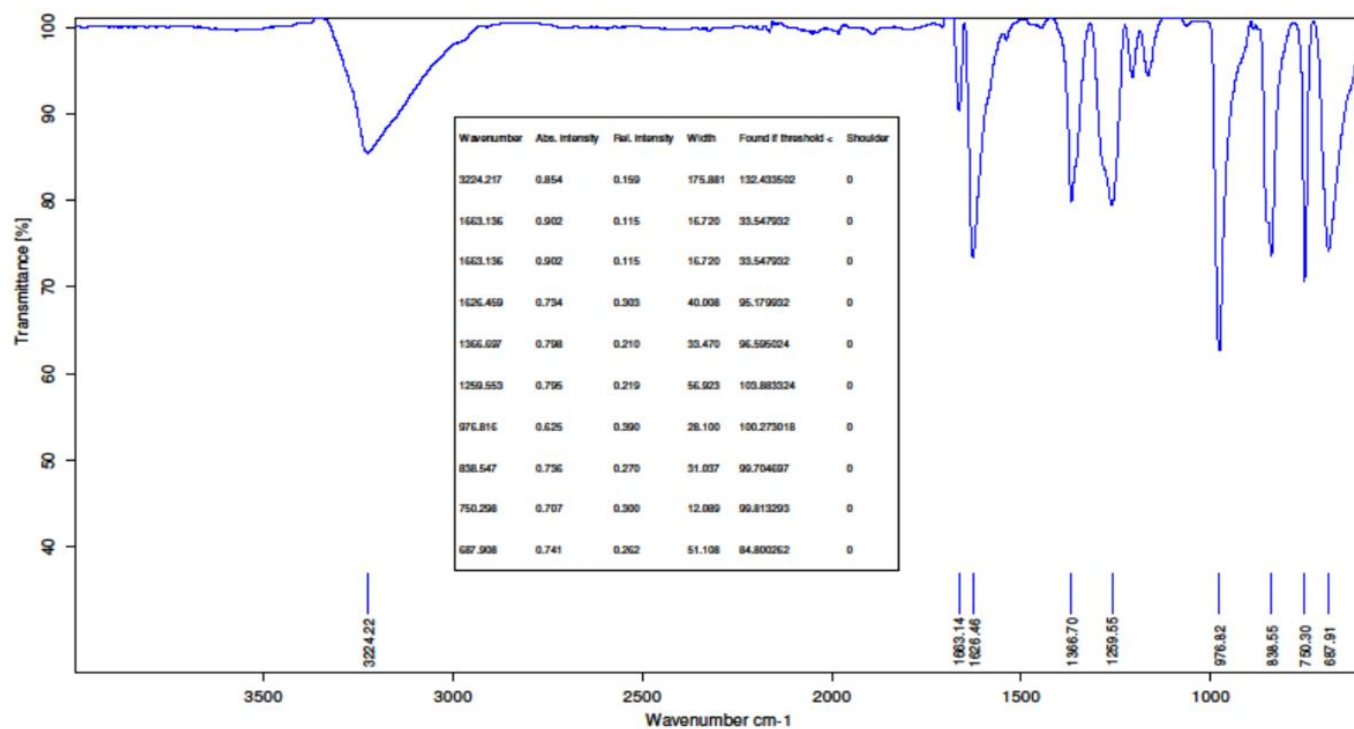

Figure S1 ATR Infrared spectrum of  $\text{CaH}_2 \cdot \text{H}_2\text{O}$ .

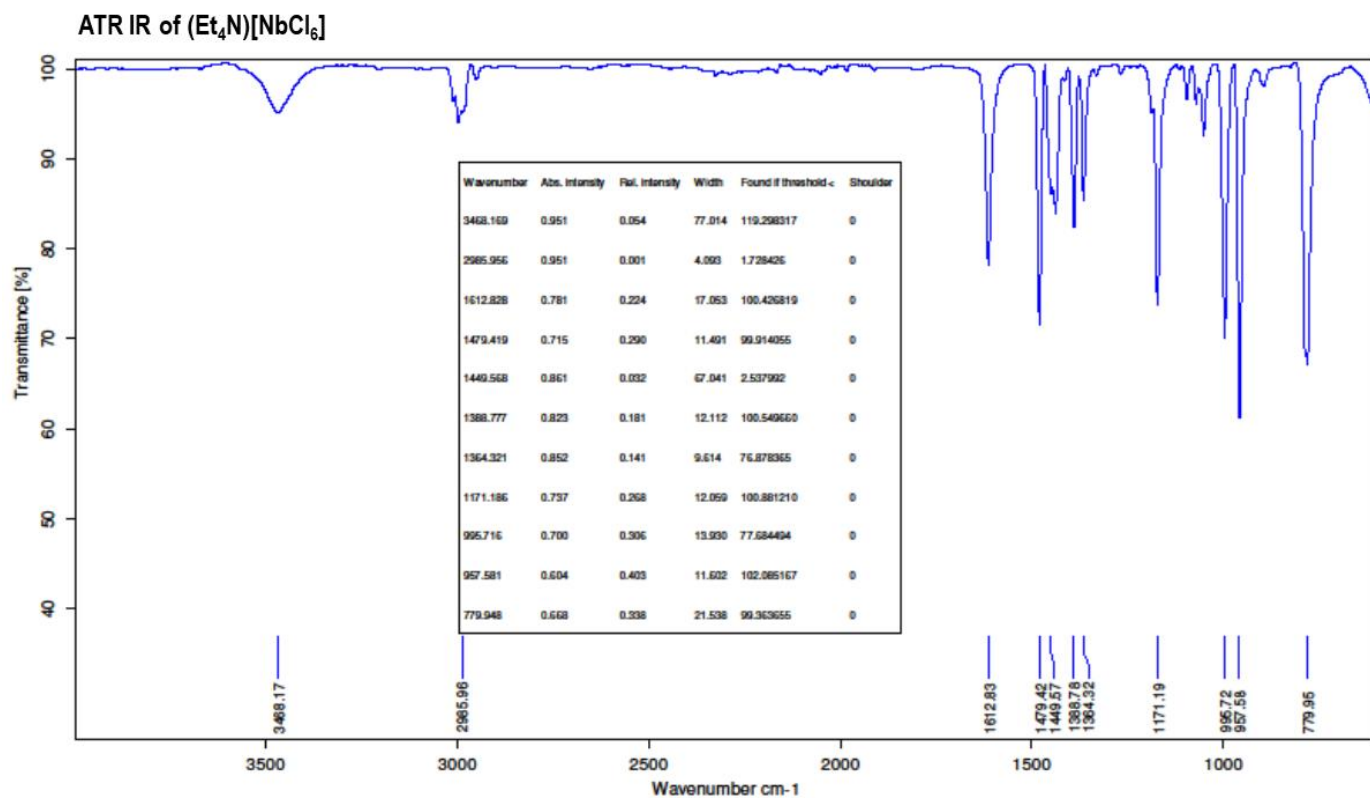

Figure S2 ATR Infrared spectrum of (Et<sub>4</sub>N)[NbCl<sub>6</sub>] (1).

ATR IR of  $(\text{Et}_4\text{N})\text{cis}[\text{NbO}(\text{ca})_2(\text{H}_2\text{O})\text{OPPh}_3]\cdot 3\text{H}_2\text{O}\cdot\text{THF}$  (**5**)

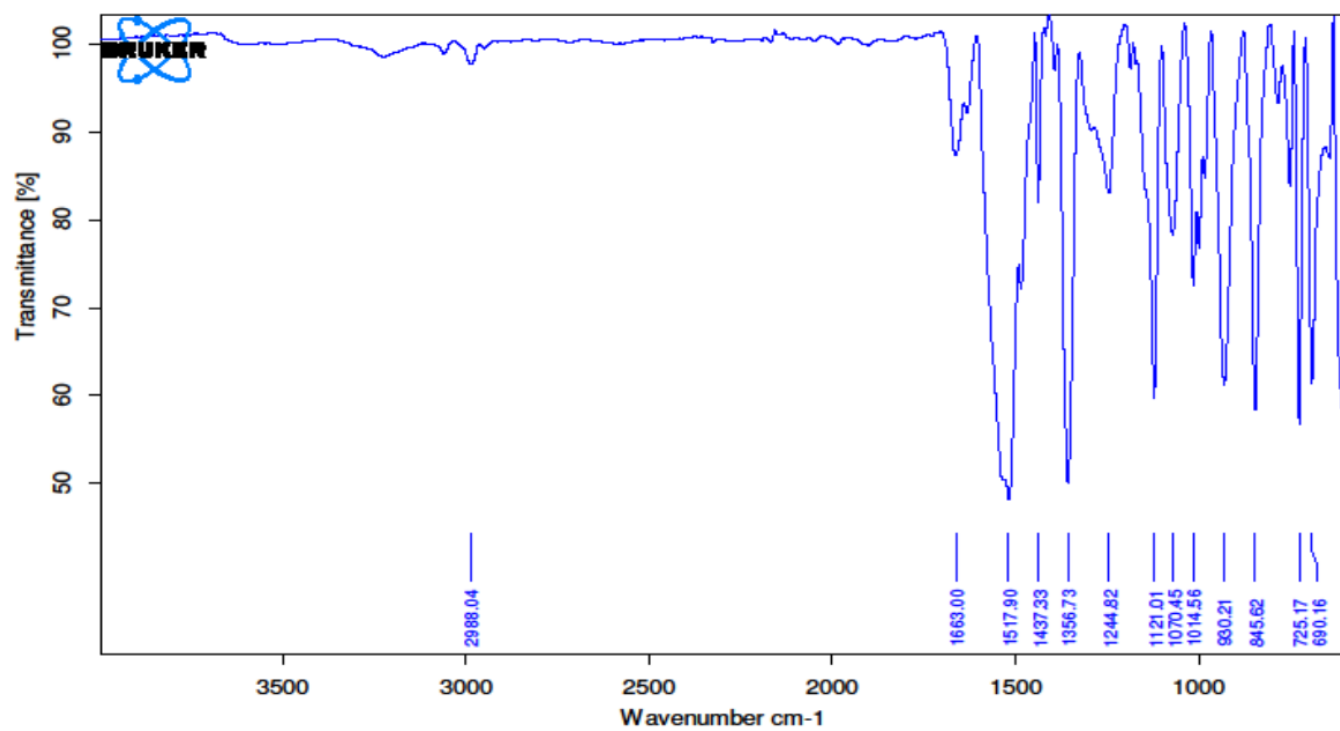

Figure S3 ATR Infrared spectrum of  $(\text{Et}_4\text{N})\text{cis}[\text{NbO}(\text{ca})_2(\text{H}_2\text{O})\text{OPPh}_3]\cdot 3\text{H}_2\text{O}\cdot\text{THF}$  (**5**).

ATR IR of  $(\text{Et}_4\text{N})_4[\text{Nb}_4\text{O}_4(\text{ca})_2(\mu^2\text{-O})_2\text{Cl}_8]\cdot 2\text{CH}_3\text{CN}$  (**6**)

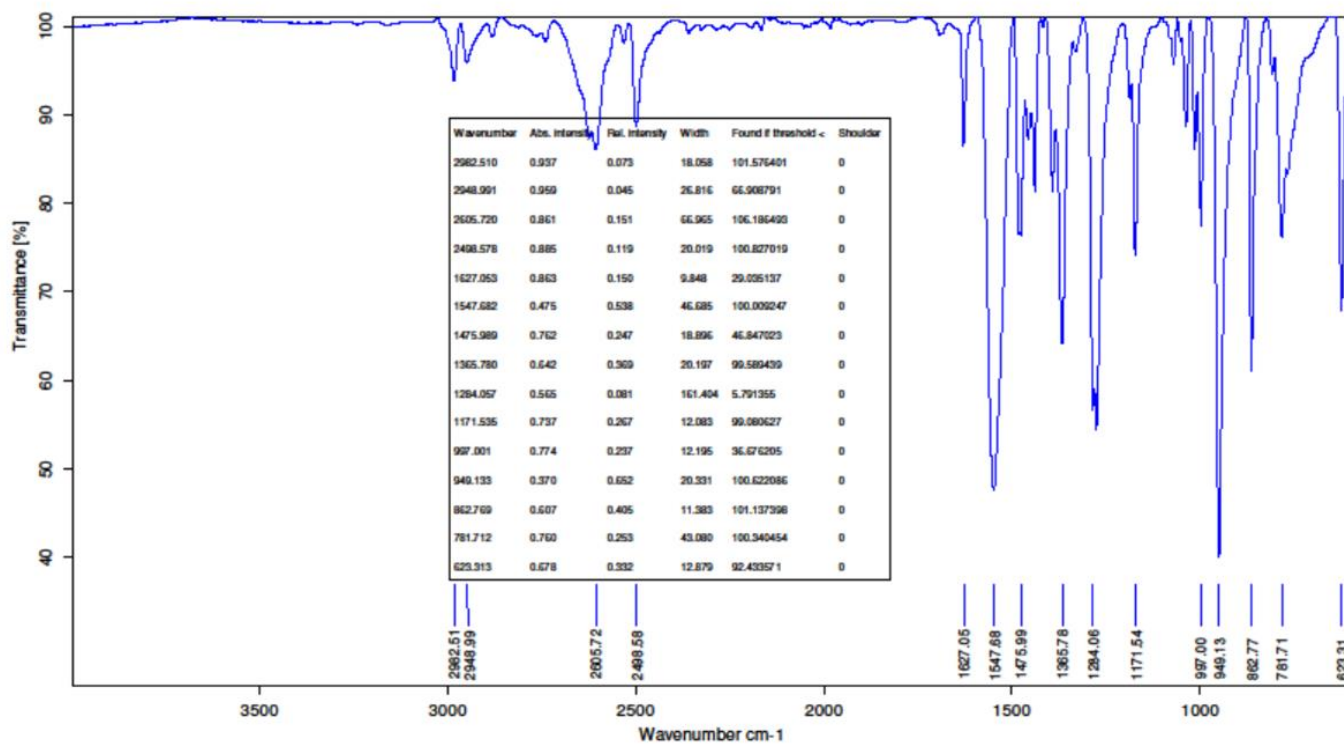

Figure S4 ATR Infrared spectrum of  $(\text{Et}_4\text{N})_4[\text{Nb}_4\text{O}_4(\text{ca})_2(\mu^2\text{-O})_2\text{Cl}_8]\cdot 2\text{CH}_3\text{CN}$  (**6**).

$^1\text{H}$  NMR of  $\text{CaH}_2 \cdot 2\text{H}_2\text{O}$  (**2**) in  $\text{DMSO-d}_6$

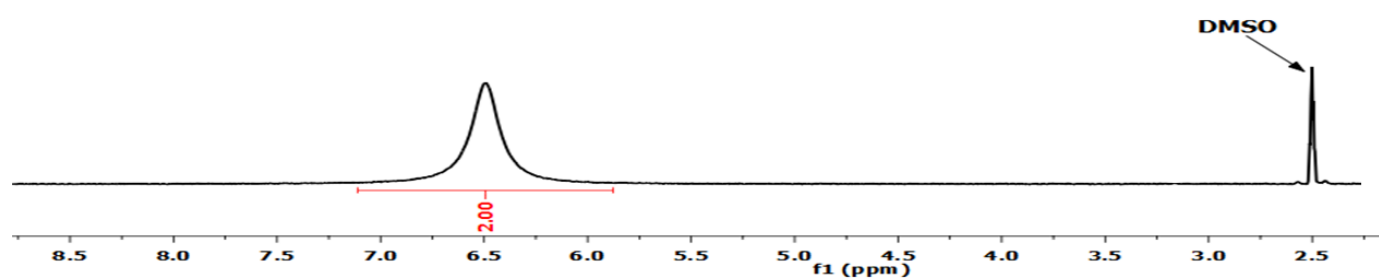

Figure S5  $^1\text{H}$ -NMR spectrum of  $\text{CaH}_2 \cdot 2\text{H}_2\text{O}$  (**2**) in  $\text{DMSO-d}_6$ .

$^1\text{H}$  NMR of  $\text{OPPh}_3$  in  $\text{MeCN-d}_3$

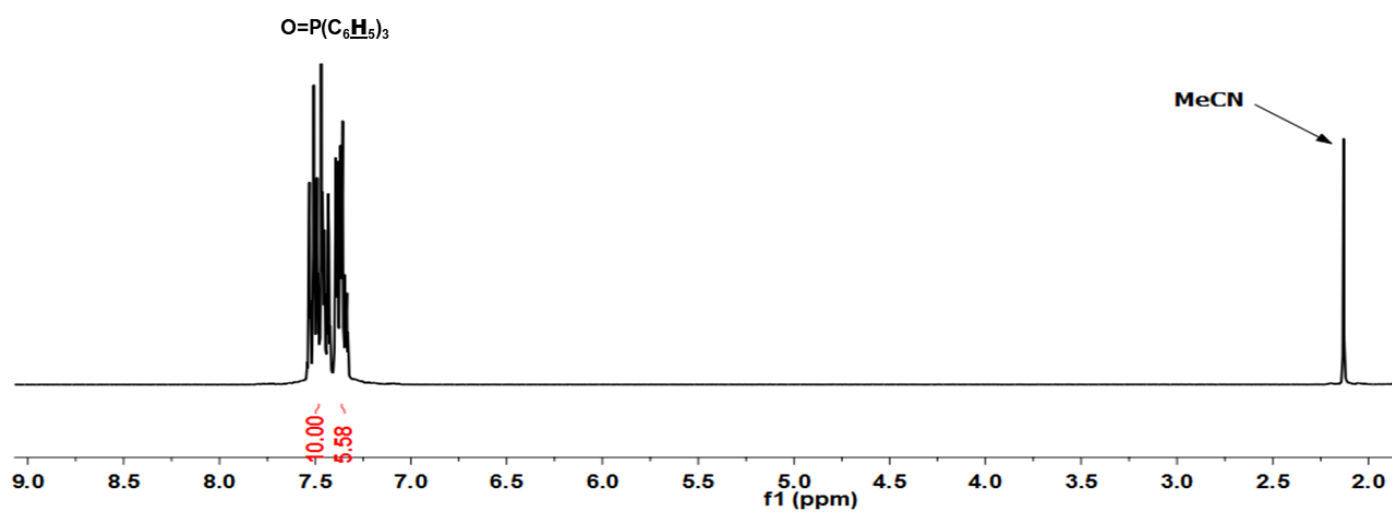

Figure S6  $^1\text{H}$ -NMR spectrum of triphenylphosphine oxide in  $\text{DMSO-d}_6$ .

$^1\text{H}$  NMR of  $(\text{Et}_4\text{N})\text{cis}[\text{NbO}(\text{ca})_2(\text{H}_2\text{O})\text{OPPh}_3]\cdot 3\text{H}_2\text{O}\cdot \text{THF}$  (**5**) in  $\text{MeCN-d}_3$

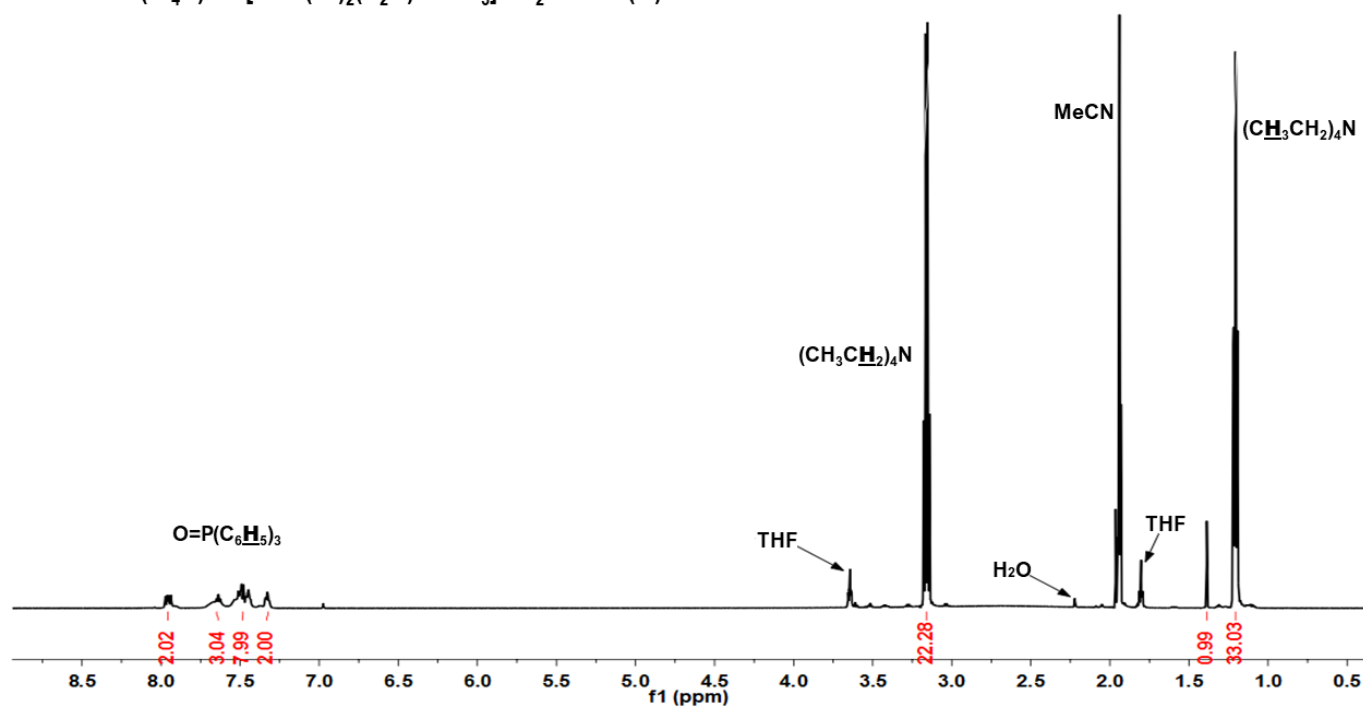

Figure S7  $^1\text{H}$  NMR spectrum of  $(\text{Et}_4\text{N})\text{cis}[\text{NbO}(\text{ca})_2(\text{H}_2\text{O})\text{OPPh}_3]\cdot 3\text{H}_2\text{O}\cdot \text{THF}$  (**5**) in  $\text{DMSO-d}_6$ .

$^1\text{H}$  NMR of  $(\text{Et}_4\text{N})_4[\text{Nb}_4\text{O}_4(\text{ca})_2(\mu^2\text{-O})_2\text{Cl}_8]\cdot 2\text{CH}_3\text{CN}$  (**6**) in  $\text{DMSO-d}_6$

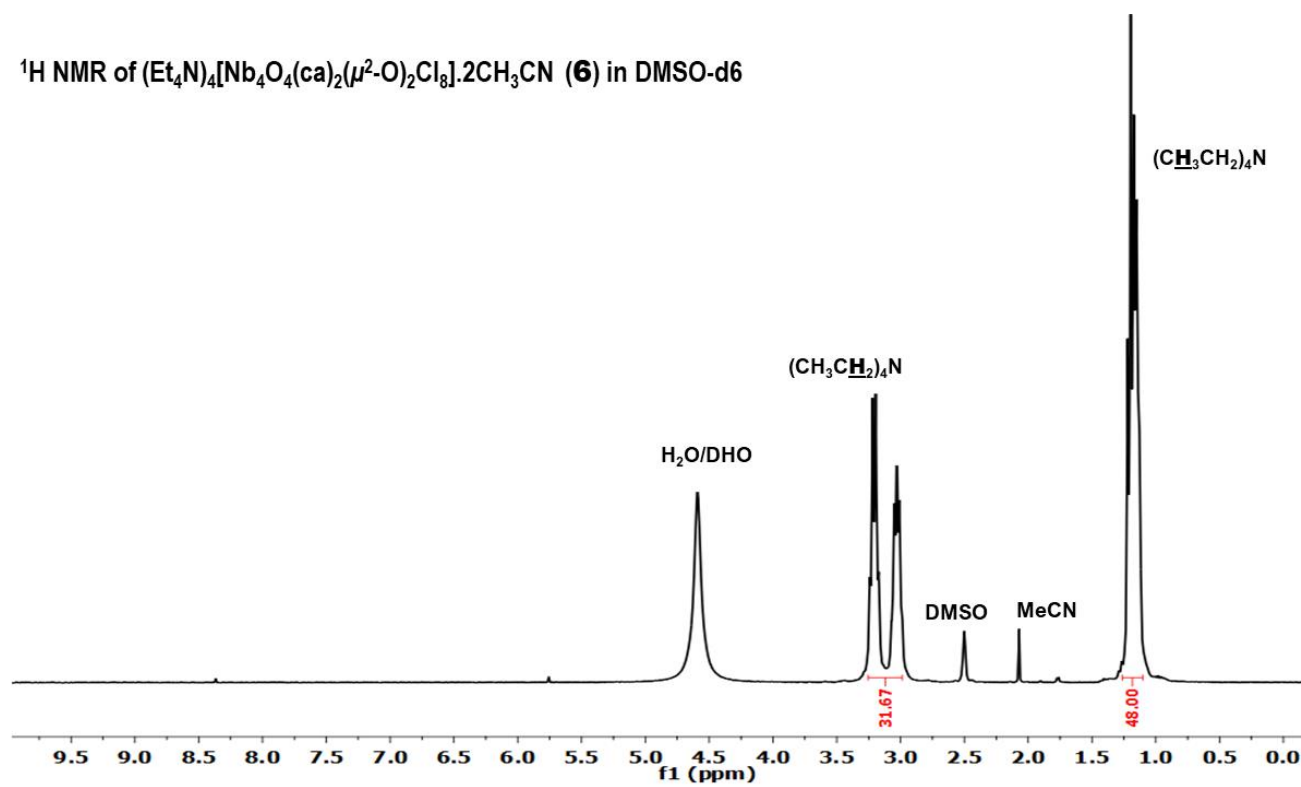

Figure S8  $^1\text{H}$ -NMR spectrum  $(\text{Et}_4\text{N})_4[\text{Nb}_4\text{O}_4(\text{ca})_2(\mu^2\text{-O})_2\text{Cl}_8]\cdot 2\text{CH}_3\text{CN}$  (**6**) in  $\text{DMSO-d}_6$ .

$^{13}\text{C}$  NMR of  $(\text{Et}_4\text{N})[\text{NbCl}_6]$  in  $\text{DMSO-d}_6$

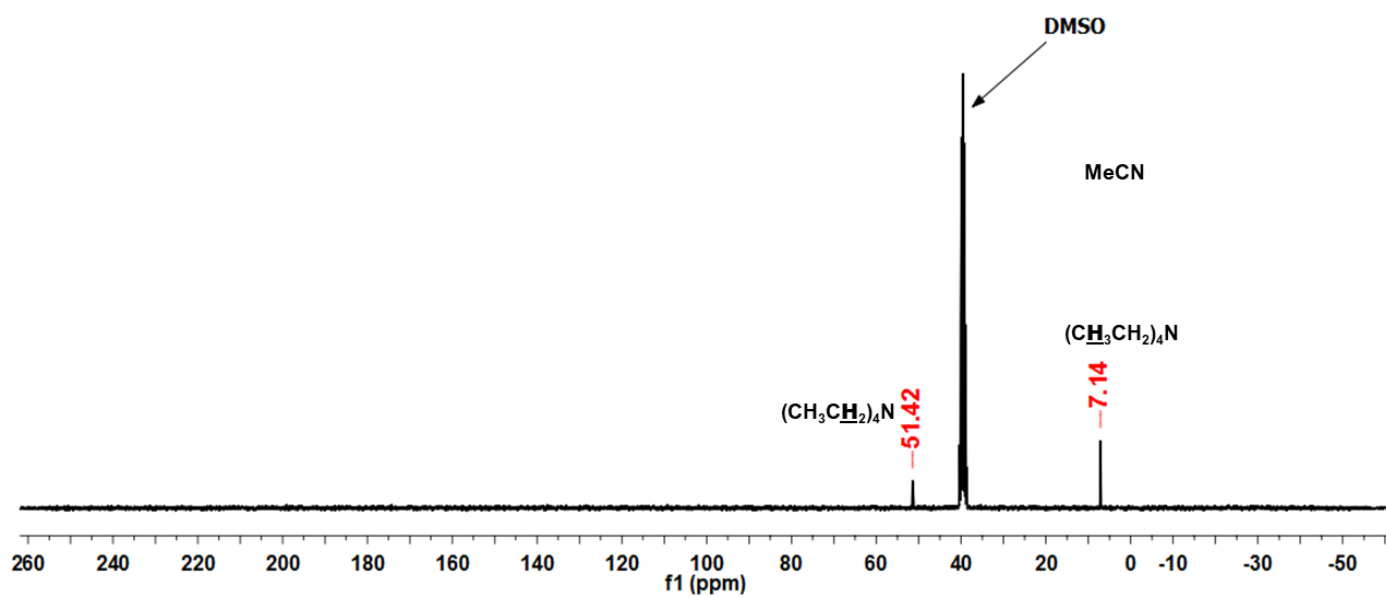

Figure S9 C-13 NMR spectrum of  $(\text{Et}_4\text{N})[\text{NbCl}_6]$  (1) in  $\text{DMSO-d}_6$ .

$^{13}\text{C}$  NMR of  $(\text{Et}_4\text{N})\text{cis}[\text{NbO}(\text{ca})_2(\text{H}_2\text{O})\text{OPPh}_3]\cdot 3\text{H}_2\text{O}\cdot\text{THF}$  (**5**) in  $\text{MeOH-d}_4$

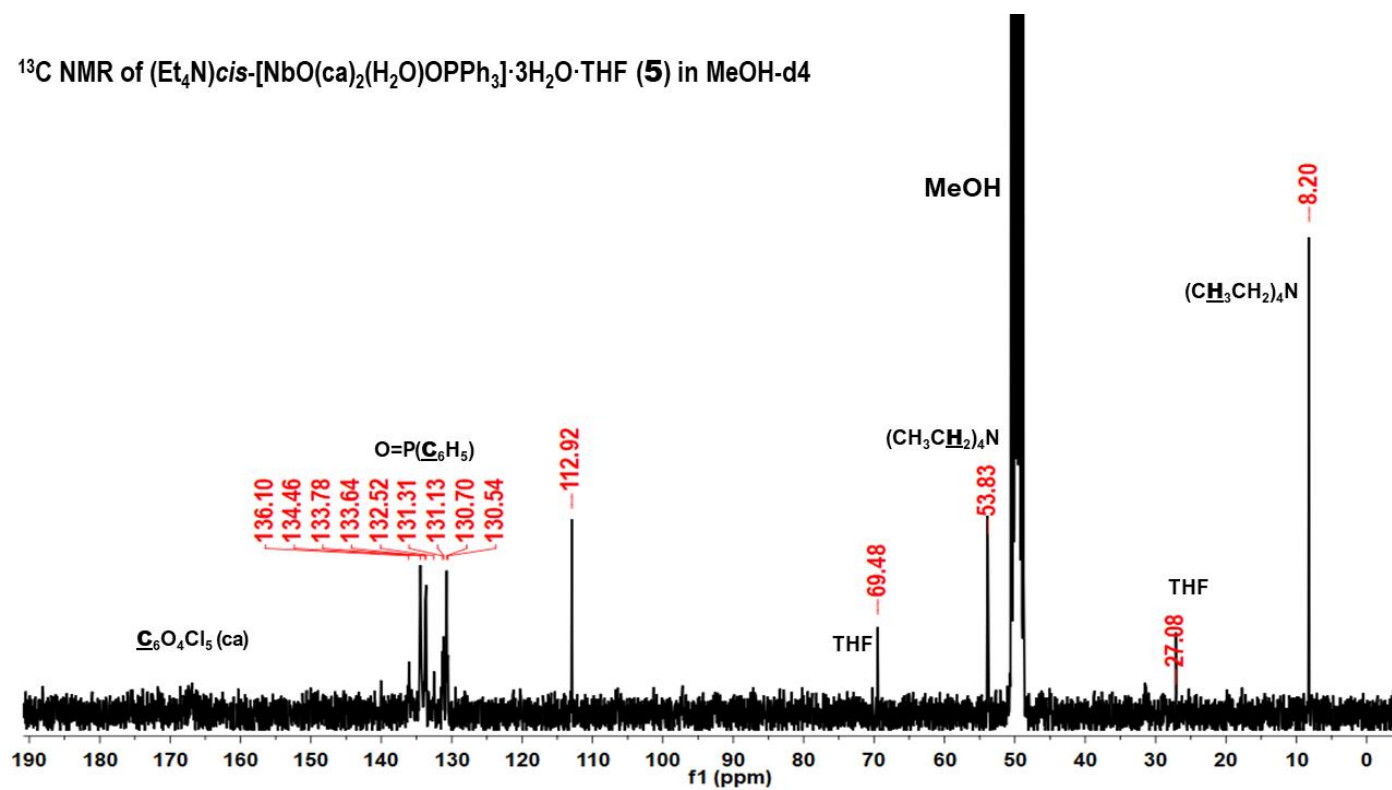

Figure S10 C-13 NMR spectrum of  $(\text{Et}_4\text{N})\text{cis}[\text{NbO}(\text{ca})_2(\text{H}_2\text{O})\text{OPPh}_3]\cdot 3\text{H}_2\text{O}\cdot\text{THF}$  (**5**) in  $\text{DMSO-d}_6$ .

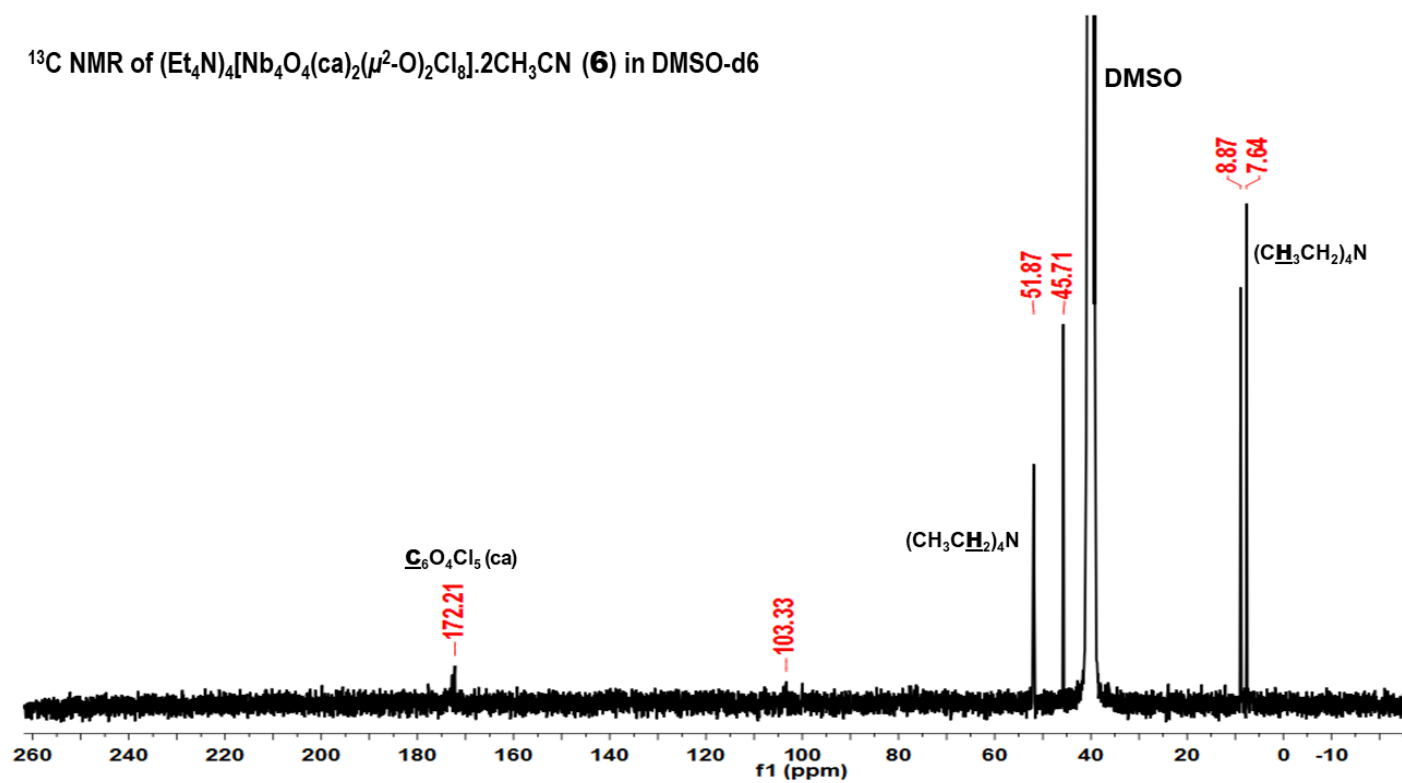

Figure S11 C-13 NMR spectrum of  $(\text{Et}_4\text{N})_4[\text{Nb}_4\text{O}_4(\text{ca})_2(\mu^2\text{-O})_2\text{Cl}_8]\cdot 2\text{CH}_3\text{CN}$  (**6**) in DMSO- $\text{d}_6$ .

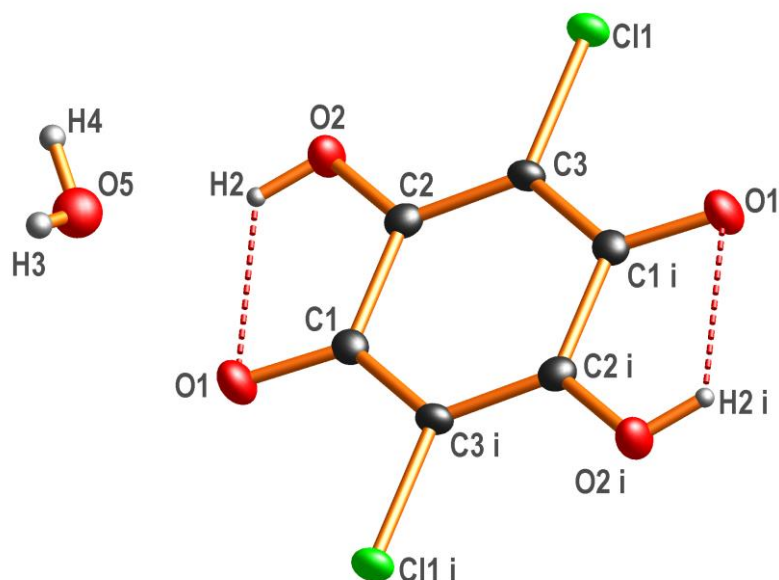

**Figure S12** DIAMOND<sup>10</sup> view of  $\frac{1}{2}(\text{caH}_2) \cdot \text{H}_2\text{O}$  (2) with atom numbering system shown and thermal ellipsoids drawn at a 50% probability displacement. Atoms generated by symmetry are indicated by lower case roman numerals corresponding to the symmetry operator (i) 1-x, -y, -z.

**Note:** Numbering of atoms in (2) in Supplementary Materials, Figs A13-15 below, are chronologically and *not* always as in manuscript.

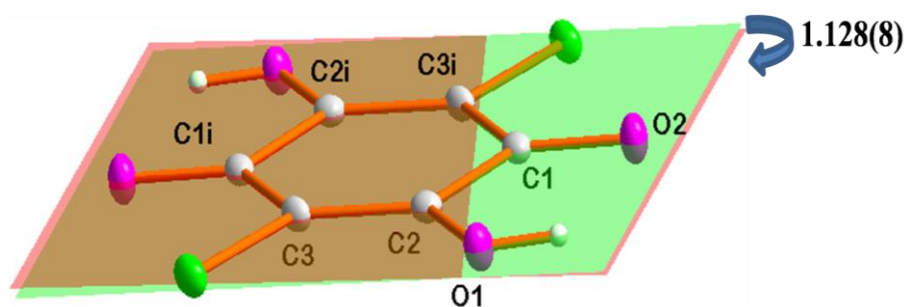

**Figure S13** Representation of the plane passing through the four atoms O1, C2, C1 and O2 (plane 1, green) and the plane passing through the six atoms of chloranilic acid ring C1, C2, C3, C1i, C2i, and C3i (plane 2, pink). The solvated water molecule is omitted for clarity.

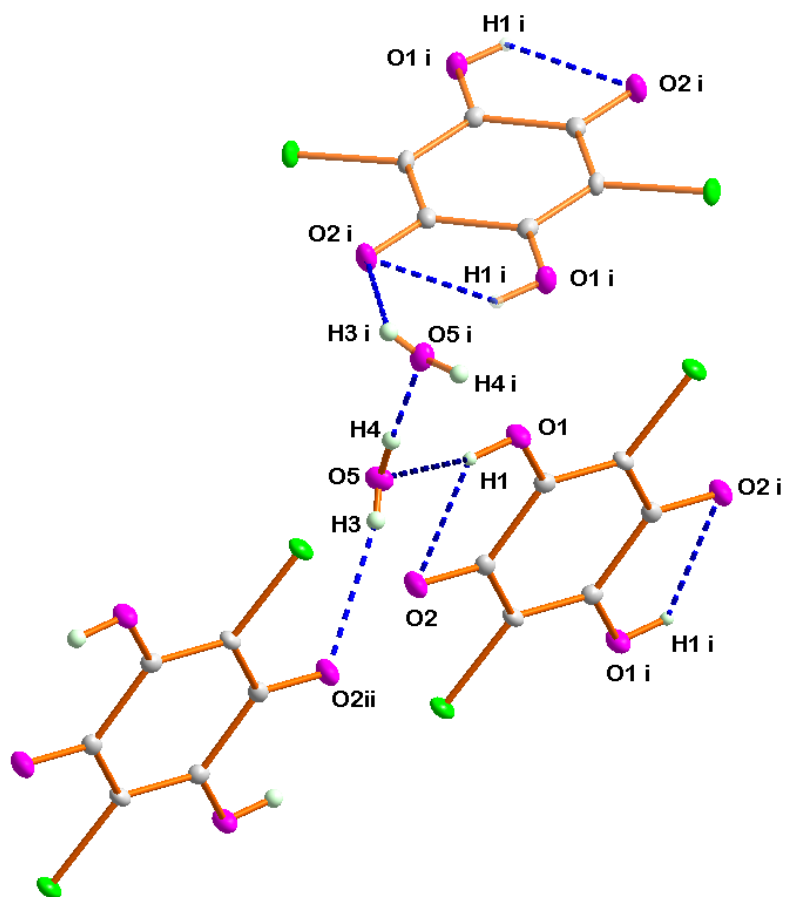

**Figure S14** Inter- and intramolecular interactions of  $\frac{1}{2}(\text{caH}_2) \cdot \text{H}_2\text{O}$  (2). The blue dashed lines indicate O-H...O hydrogen bonds. [Symmetry codes:  $-x$ ,  $-y$ ,  $-z$ ,  $x$ ,  $\frac{1}{2} - y$ ,  $z + \frac{1}{2}$ ].

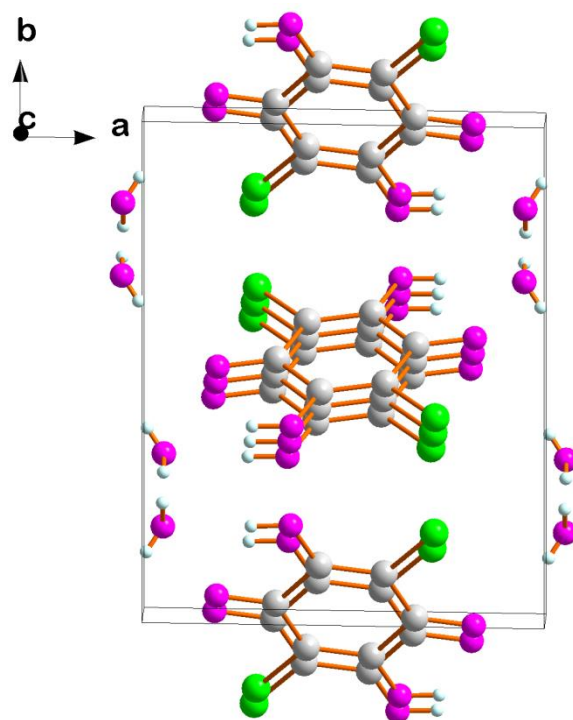

**Figure S15** Unit cell for  $\frac{1}{2}(\text{caH}_2) \cdot \text{H}_2\text{O}$  (2) showing  $\pi$ - $\pi$  stacking interactions along the c-axis.

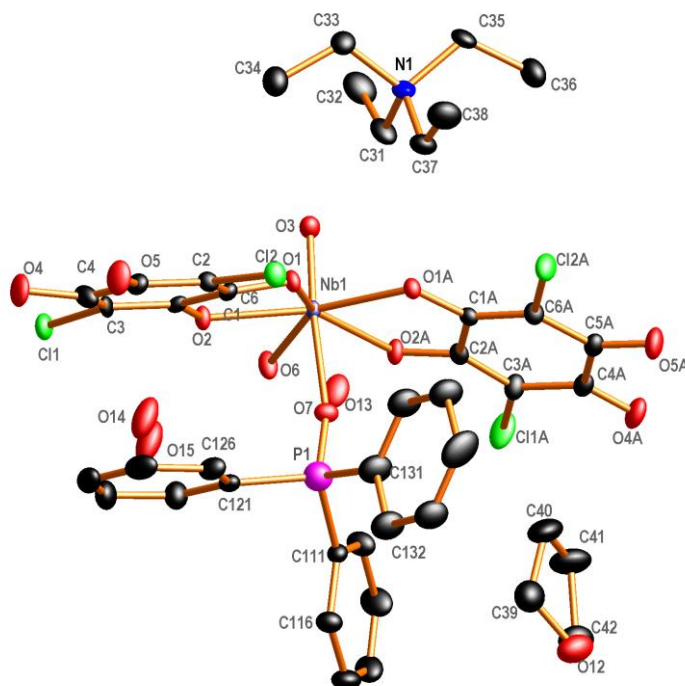

**Figure S16** Molecular structure of *cis*-[NbO(ca)<sub>2</sub>(H<sub>2</sub>O)OPPh<sub>3</sub>] (5a) with atom numbering system shown and the thermal ellipsoids drawn at a 50% probability level. Cation, hydrogen atoms and solvated molecules are omitted for clarity.

**Note:** Numbering of atoms in (5) in Supplementary Materials, Figs A17-A23 below, are chronologically and *not* always as in manuscript.

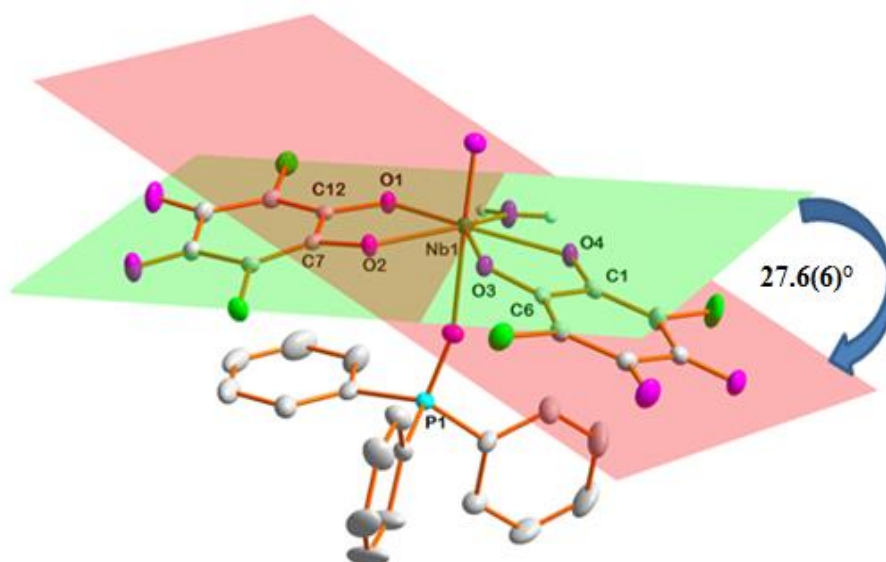

**Figure S17** Representation of planes through *cis*-[NbO(ca)<sub>2</sub>(H<sub>2</sub>O)OPPh<sub>3</sub>] (5a). Plane 1 (green) passing through the five membered ring of chloranilate ligand in O1, C12, C7 and O2 and plane 2 (pink) passing through the five membered ring of chloranilate ligand (ca) in O3, C6, C1 and O4. H-atoms, counter ions and solvated molecules are omitted for clarity.

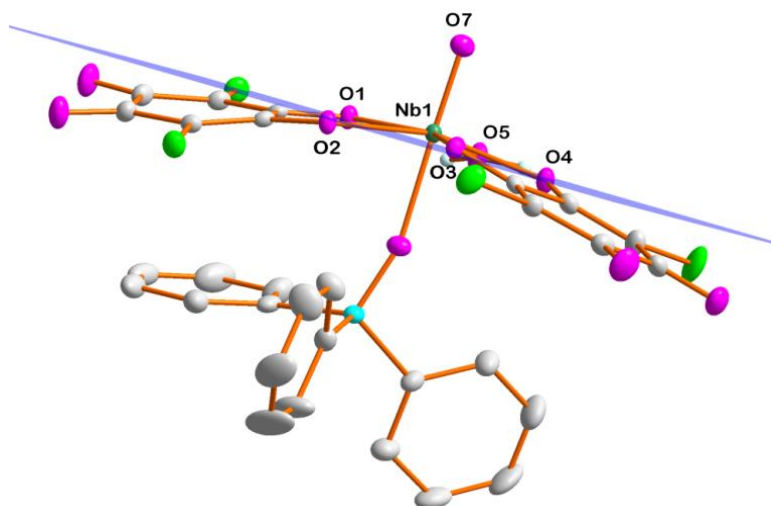

**Figure S18** Representation of *cis*-[NbO(ca)<sub>2</sub>(H<sub>2</sub>O)OPPh<sub>3</sub>] (5a). The blue plane constructed through the five oxygen atoms O1, O2, O3, O4 and O5 illustrates the distance between the plane and O7. H-atoms, counter ions and solvated molecules are omitted for clarity.

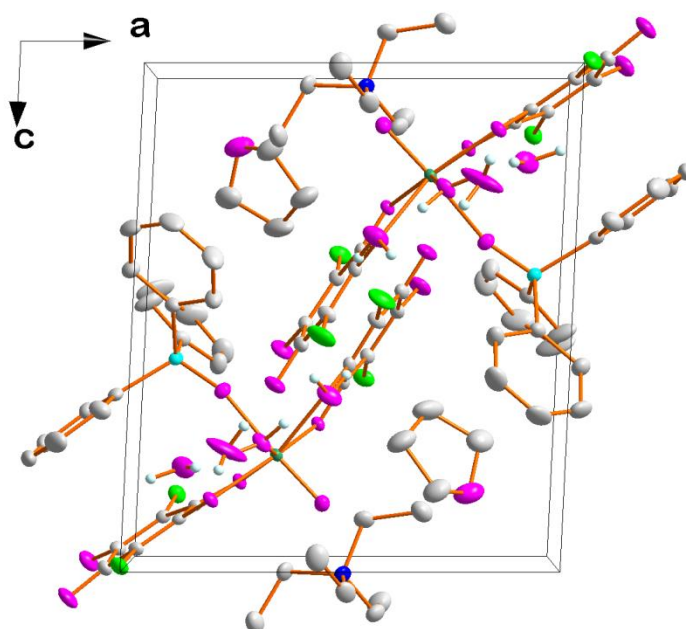

**Figure S19** Packing diagram of *cis*-(Et<sub>4</sub>N)[NbO(ca)<sub>2</sub>(H<sub>2</sub>O)OPPh<sub>3</sub>].3H<sub>2</sub>O.THF (5) showing two molecular formula per unit cell along b-axis. H-atoms are omitted for clarity.

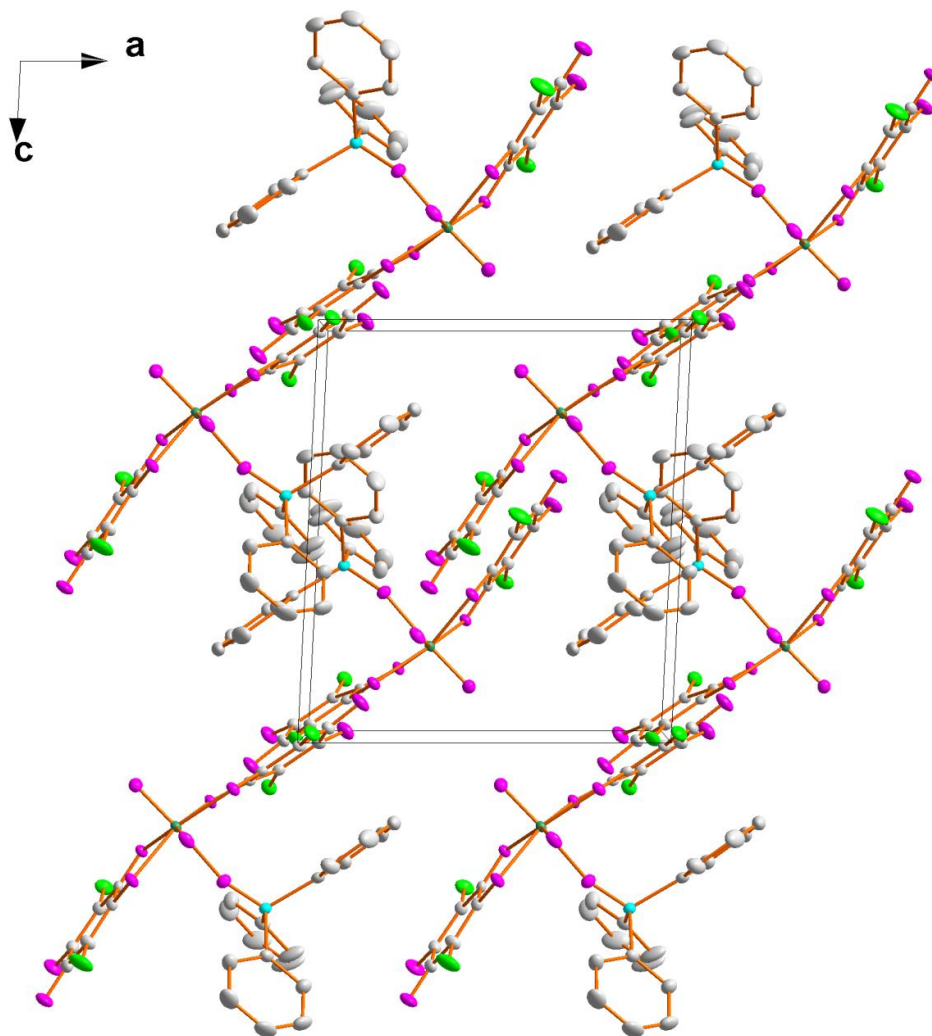

**Figure S20** Expanded packing diagram of *cis*-[NbO(ca)<sub>2</sub>(H<sub>2</sub>O)OPPh<sub>3</sub>] (5a) showing extended wing-like orientation chain head to tail  $\pi$ - $\pi$  stacking interactions along the b-axis. H-atoms, counter ions and solvated molecules are omitted for clarity.

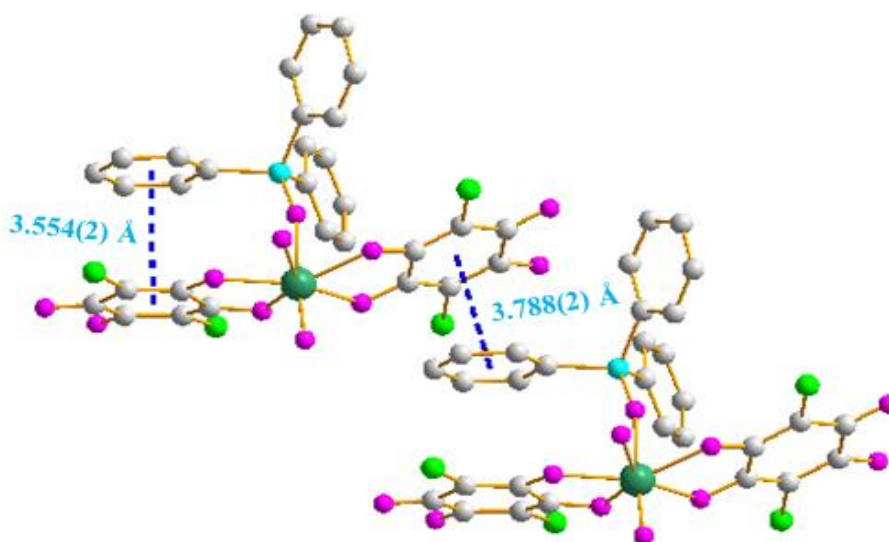

**Figure S21** Extended structure of *cis*-[NbO(ca)<sub>2</sub>(H<sub>2</sub>O)OPPh<sub>3</sub>] (5a) showing head to tail packing interaction along the b-axis. The thick blue dashed lines indicate  $\pi$ - $\pi$  stacking interactions [centroid-centroid distance = 3.554(2) and 3.788(2) Å,  $-1+x, y, z$ ] between a phenyl ring on the OPPh<sub>3</sub> and coordinated chloranilate (ca) ligands. H-atoms, counter ions and solvated molecules are omitted for clarity.

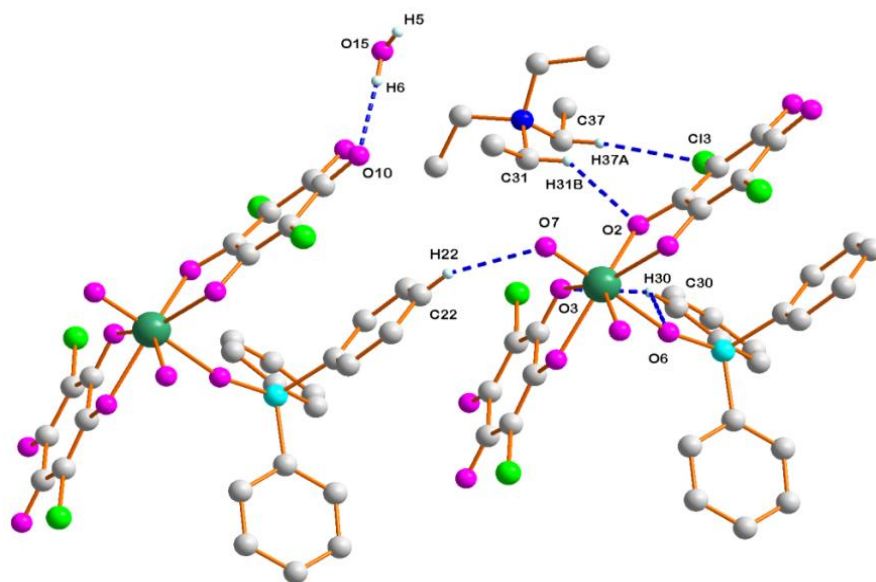

**Figure S22** Extended structure of  $(\text{Et}_4\text{N})\text{cis}-[\text{NbO}(\text{ca})_2(\text{H}_2\text{O})\text{OPPh}_3]\cdot 3\text{H}_2\text{O}\cdot \text{THF}$  (**5**) showing the intra- and intermolecular interactions. The blue dashed lines indicate O-H...O, C-H...O and C-H...Cl hydrogen-bonds.

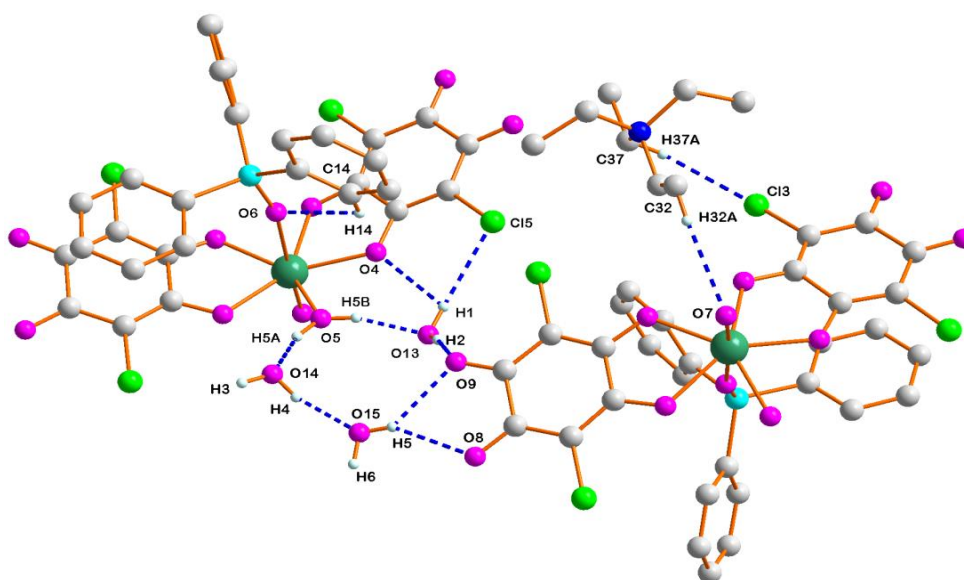

**Figure S23** Extended structure of  $(\text{Et}_4\text{N})\text{cis}-[\text{NbO}(\text{ca})_2(\text{H}_2\text{O})\text{OPPh}_3]\cdot 3\text{H}_2\text{O}\cdot \text{THF}$  (**5**) showing blue dashed lines, indicating different triangle and v-shaped bifurcated hydrogen-bonds found between its symmetry-generated molecules. The rest of the hydrogen atoms are omitted for clarity.

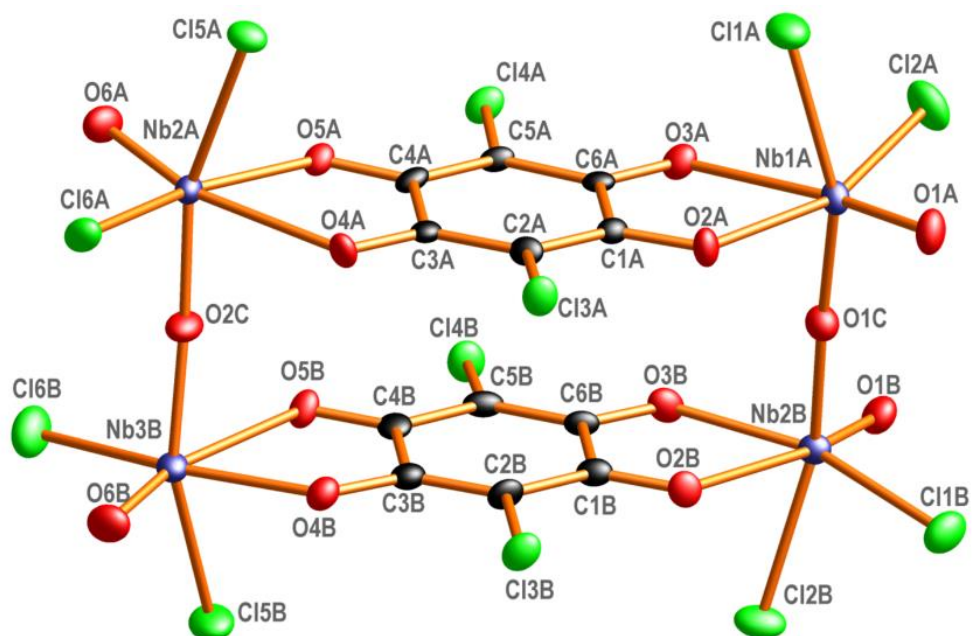

**Figure S24** Tetranuclear structure of the  $[\text{Nb}_4\text{O}_4(\text{ca})_2(\mu^2\text{-O})_2\text{Cl}_8]$  anion of (6a) with hydrogen atoms, counter ions, and solvated molecules omitted for clarity.



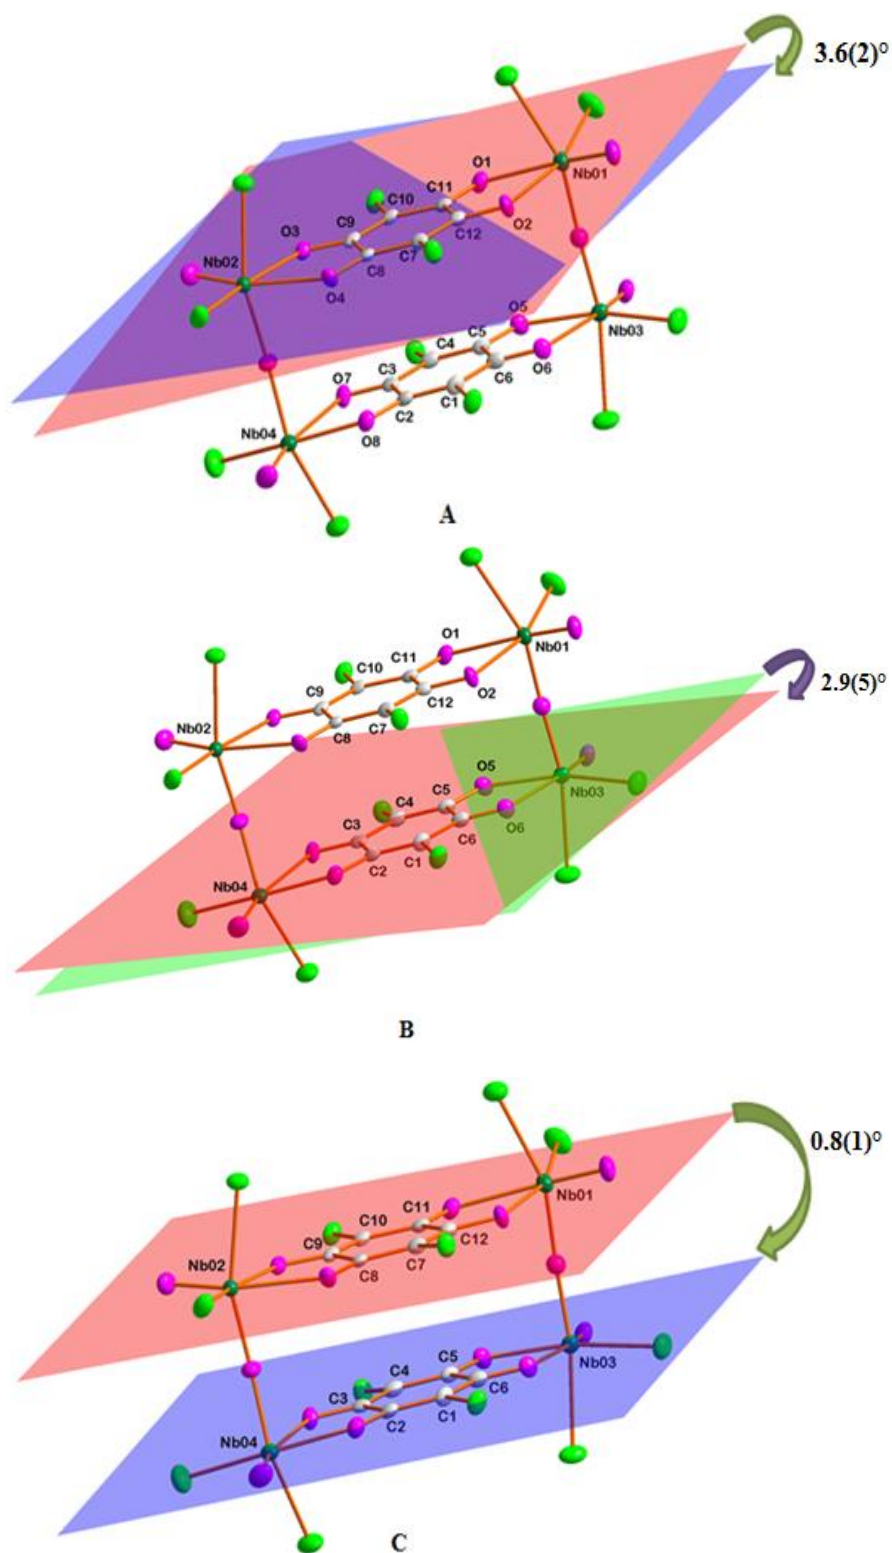

**Figure S26** Representation of the planes through [Nb<sub>4</sub>O<sub>4</sub>(ca)<sub>2</sub>(μ<sup>2</sup>-O)<sub>2</sub>Cl<sub>8</sub>] (6a), **(A)** plane 1 (red) passing through the five-membered ring of μ-chloranilate in O1, C11, C12, O2 and Nb01 and plane 2 (blue) passing through the μ-chloranilate ring of C7-C12; **(B)** plane 1 (red) passing through the five membered ring of μ-chloranilate in O5, C5, C6, O6 and Nb03 and plane 2 (green) passing through the μ-chloranilate ring of C1-C6; **(C)** plane 1 (red) passing through the top of the μ-chloranilate ring of C7-C12 and plane 2 (blue) passing through the bottom of μ-chloranilate ring of C1-C6. The counter ion, solvated diacetonitrile molecules and H-atoms are omitted for clarity.

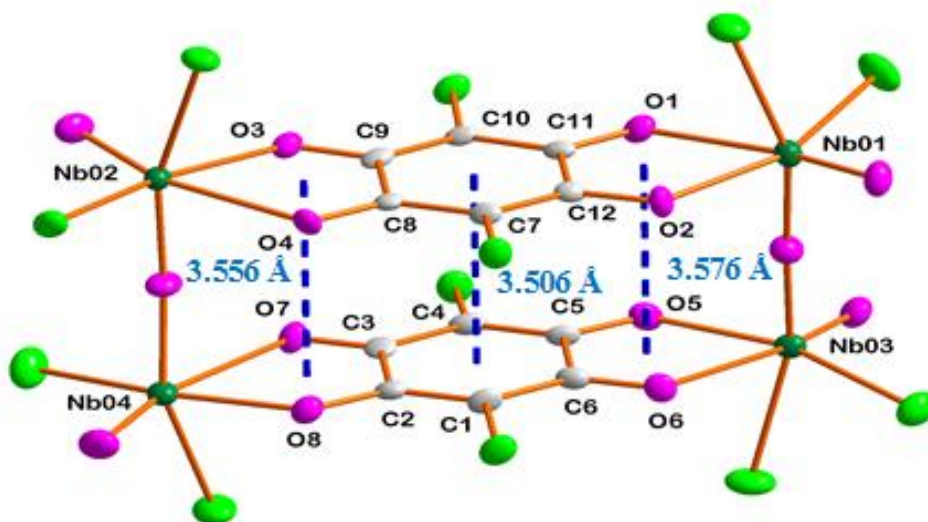

**Figure S27** Tetranuclear structure of  $[\text{Nb}_4\text{O}_4(\text{ca})_2(\mu^2\text{-O})_2\text{Cl}_8]$  (6a) anion of with the thick blue dashed lines indicating  $\pi$ - $\pi$  stacking interactions between the  $\mu$ -chloranilate rings (C7-C12 and C1-C6) and five membered rings of  $\mu$ -chloranilate ligands (Nb02, O3, C9, C8, and O4 and Nb04, O7, C3, C2, and O8 and as well as Nb01, O2, C12, C11, and O1 and Nb03, O6, C6, C5, and O5 ). Hydrogen atoms, counter ions and solvated molecules are omitted for clarity.

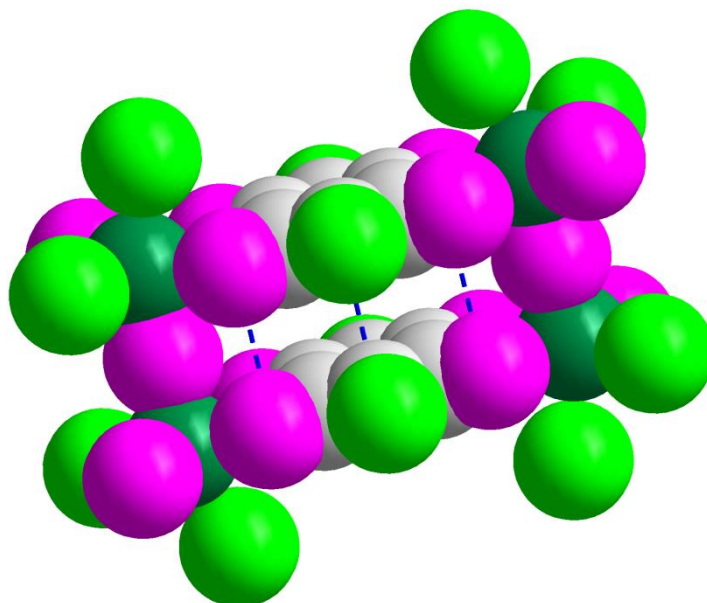

**Figure S28** Tetranuclear structure of  $[\text{Nb}_4\text{O}_4(\text{ca})_2(\mu^2\text{-O})_2\text{Cl}_8]$  (6a) with space filling, the thick blue dashed lines indicating  $\pi$ - $\pi$  stacking interactions between the  $\mu$ -chloranilate rings (C7-C12 and C1-C6) and five membered rings of  $\mu$ -chloranilate ligands (Nb02, O3, C9, C8, and O4 and Nb04, O7, C3, C2, and O8 and as well as Nb01, O2, C12, C11, and O1 and Nb03, O6, C6, C5, and O5) (Figure 5.14). Thermal ellipsoids are drawn at the 50% probability level and with the van der Waal distance of 1.25 Å. Hydrogen atoms, counter ions and solvated molecules are omitted for clarity.

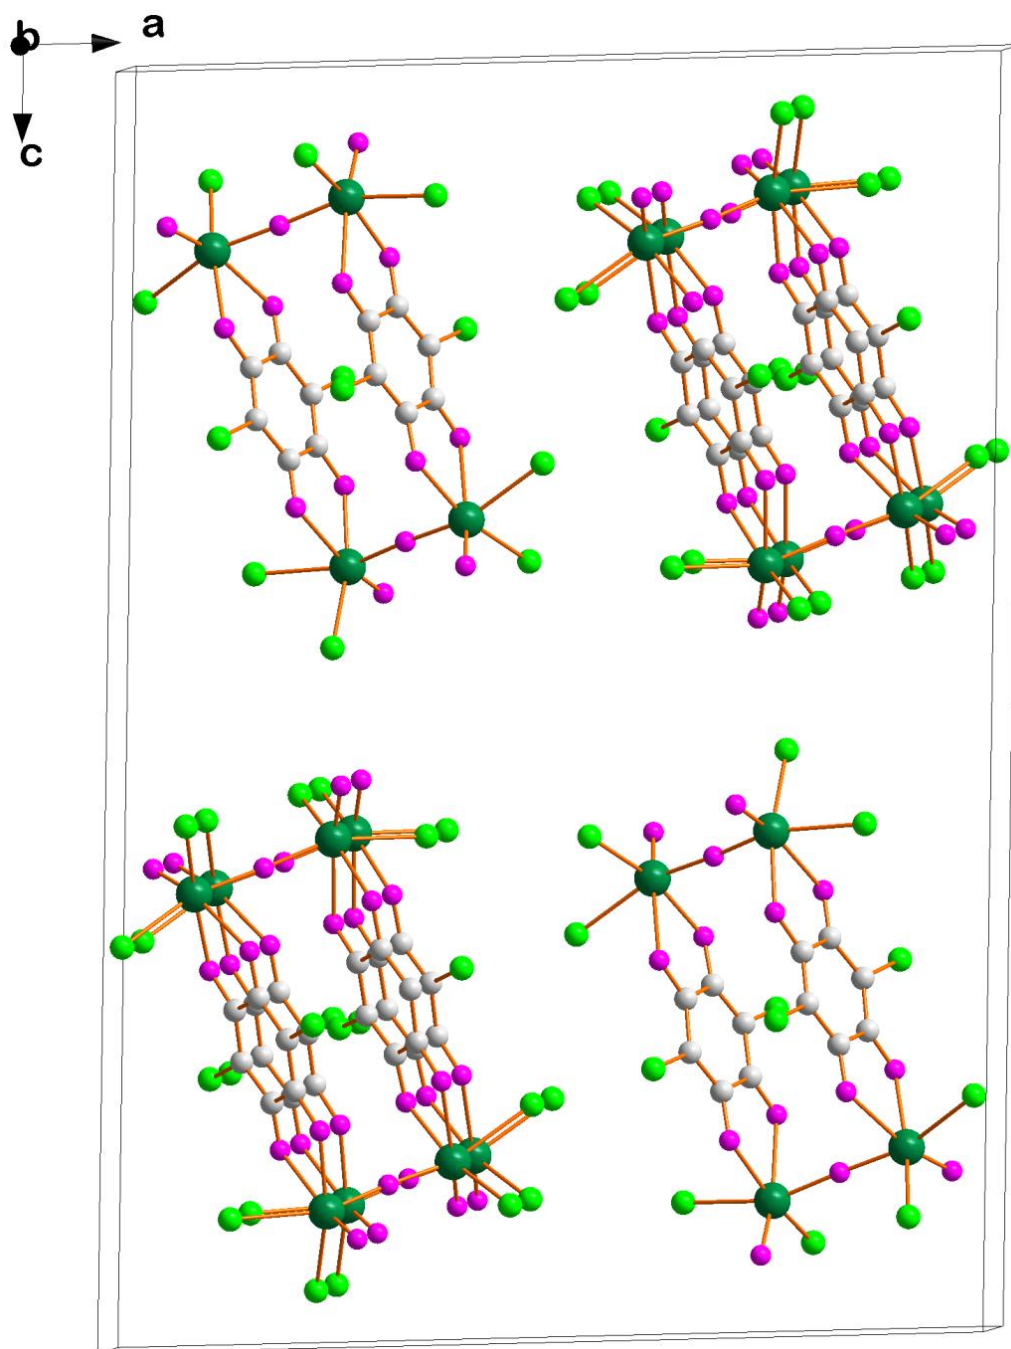

**Figure S29** Tetranuclear structure of  $[\text{Nb}_4\text{O}_4(\text{ca})_2(\mu^2\text{-O})_2\text{Cl}_8]$  of (6a) showing sheet like crystal packing along the b-axis. H-atoms, counter ions and solvated molecules are omitted for clarity.

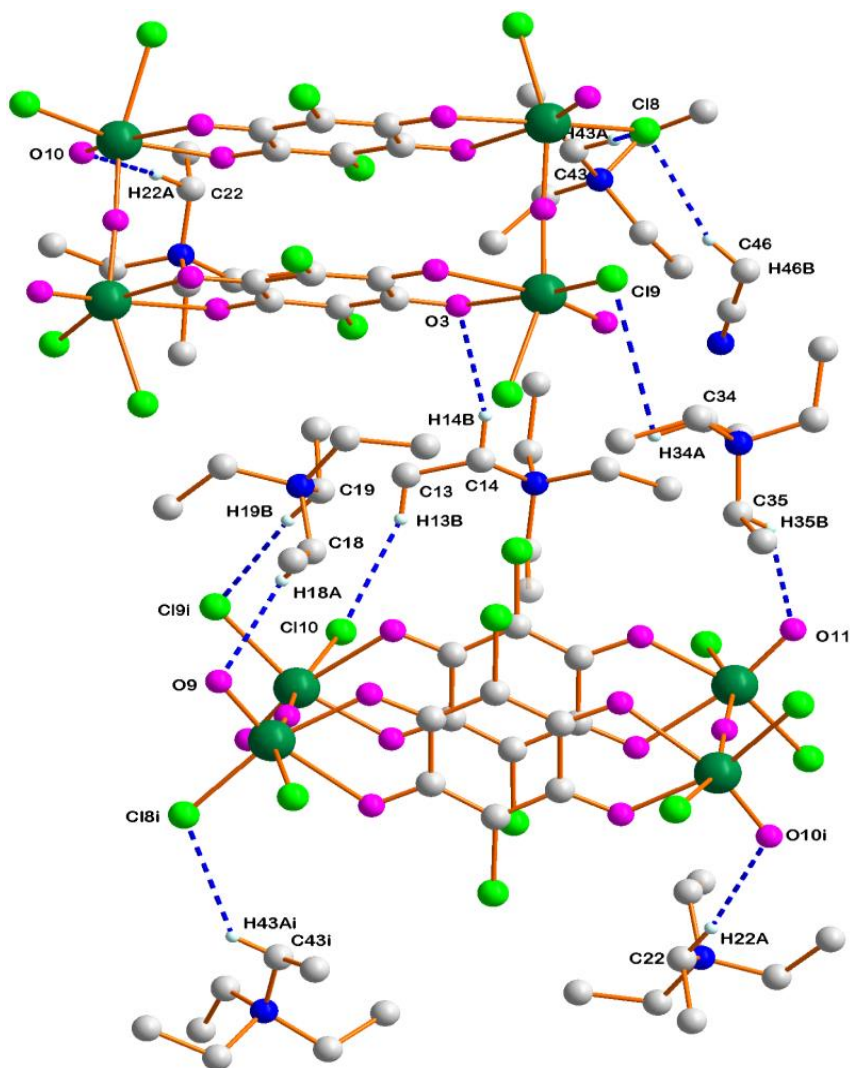

**Figure S30** Tetranuclear structure of  $(\text{Et}_4\text{N})_4[\text{Nb}_4\text{O}_4(\text{ca})_2(\mu^2\text{-O})_2\text{Cl}_8]\cdot 2\text{CH}_3\text{CN}$  (**6**) showing the intra- and intermolecular interactions. The blue dashed lines indicate C-H...O and C-H...Cl extended halogen and hydrogen-bonds found between its symmetry-generated molecules. The rest of the hydrogen atoms, counter ions and solvated molecules are omitted for clarity.

**Table S2 Atomic coordinates ( $\times 10^4$ ) and equivalent isotropic displacement parameters ( $\text{\AA}^2 \times 10^3$ ) for  $\frac{1}{2}(\text{caH}_2) \cdot \text{H}_2\text{O}$  (1).  $U(\text{eq})$  is defined as one third of the trace of the orthogonalized  $U^{ij}$  tensor.**

| Atoms | x          | y          | z           | $U(\text{eq})$ |
|-------|------------|------------|-------------|----------------|
| Cl1   | 7186.6(3)  | 1424.3(3)  | 5045.5(6)   | 13.56(10)      |
| O2    | 3630.8(11) | 1584.2(9)  | 3145.6(18)  | 14.3(2)        |
| O1    | 1811.3(10) | 289.7(9)   | -1121.2(18) | 15.8(2)        |
| C1    | 3275.0(14) | 143.0(11)  | -683(2)     | 11.1(2)        |
| C2    | 4338.0(14) | 840.8(12)  | 1693(2)     | 11.1(2)        |
| C3    | 5954.4(14) | 676.2(11)  | 2301(2)     | 10.8(2)        |
| O8    | 503.5(11)  | 1844.3(10) | 2608.8(19)  | 15.6(2)        |

**Table S3 Bond lengths ( $\text{\AA}$ ) and angles ( $^\circ$ ) for  $\frac{1}{2}(\text{caH}_2) \cdot \text{H}_2\text{O}$  (1).**

| Atoms              | Distance ( $\text{\AA}$ ) | Atoms                   | Angle ( $^\circ$ ) |
|--------------------|---------------------------|-------------------------|--------------------|
| Cl1-C3             | 1.7186(12)                | O1-C1-C2                | 118.15(11)         |
| O2-C2              | 1.3173(14)                | O1-C1-C3 <sup>i</sup>   | 123.73(11)         |
| O1-C1              | 1.2256(15)                | C3 <sup>i</sup> -C1-C2  | 118.11(10)         |
| C1-C2              | 1.5104(16)                | O2-C2-C1                | 117.75(10)         |
| C1-C3 <sup>i</sup> | 1.4532(16)                | O2-C2-C3                | 122.05(11)         |
| C2-C3              | 1.3508(17)                | C3-C2-C1                | 120.18(10)         |
|                    |                           | C1 <sup>i</sup> -C3-Cl1 | 117.19(9)          |
|                    |                           | C2-C3-Cl1               | 121.12(9)          |
|                    |                           | C2-C3-C1 <sup>1</sup>   | 121.69(10)         |

Symmetry code: (i) 1-X,-Y,-Z

**Table S4 Anisotropic displacement parameters ( $\text{\AA}^2 \times 10^3$ ) for  $\frac{1}{2}(\text{caH}_2) \cdot \text{H}_2\text{O}$  (1). The anisotropic displacement factor exponent takes the form:  $-2\pi^2 [h^2 a^{*2} U^{11} + \dots + 2 h k a^* b^* U^{12}]$ .**

| Atoms | $U_{11}$  | $U_{22}$  | $U_{33}$  | $U_{23}$ | $U_{13}$ | $U_{12}$  |
|-------|-----------|-----------|-----------|----------|----------|-----------|
| Cl1   | 13.43(16) | 15.96(16) | 10.21(15) | -3.0(1)  | 0.89(11) | -3.51(10) |
| O2    | 11.3(4)   | 17.1(4)   | 14.7(4)   | -5.1(3)  | 3.6(3)   | 0.0(3)    |
| O1    | 10.7(4)   | 19.0(5)   | 16.9(5)   | -3.3(4)  | 1.9(3)   | 0.4(3)    |
| C1    | 12.3(6)   | 10.4(5)   | 10.4(5)   | 1.5(4)   | 2.1(4)   | -1.5(4)   |
| C2    | 13.7(6)   | 10.1(5)   | 9.7(5)    | 0.3(4)   | 3.3(4)   | -1.1(4)   |
| C3    | 12.1(5)   | 11.2(5)   | 8.3(5)    | -1.2(4)  | 1.3(4)   | -2.5(4)   |
| O8    | 13.8(4)   | 17.6(5)   | 16.7(5)   | -3.0(4)  | 6.2(4)   | -1.9(4)   |

**Table S5(a) Hydrogen coordinates ( $\times 10^4$ ) and isotropic displacement parameters ( $\text{\AA}^2 \times 10^3$ ) for  $\frac{1}{2}(\text{caH}_2) \cdot \text{H}_2\text{O}$  (1).**

| Atoms | x       | y        | z        | U(eq) |
|-------|---------|----------|----------|-------|
| H2    | 2628.58 | 1576.79  | 2486.34  | 21    |
| H8A   | 440(20) | 2200(20) | 4050(30) | 42(6) |
| H8B   | -70(20) | 1167(16) | 2370(40) | 38(6) |

**(b) General hydrogen-bond distances ( $\text{\AA}$ ) and angles ( $^\circ$ ) of  $\frac{1}{2}(\text{caH}_2) \cdot \text{H}_2\text{O}$  (1).**

| D-H...A      | d(D-H) ( $\text{\AA}$ ) | D(H...A) ( $\text{\AA}$ ) | d(D...A) ( $\text{\AA}$ ) | D-H...A ( $^\circ$ ) |
|--------------|-------------------------|---------------------------|---------------------------|----------------------|
| O1-H1...O5   | 0.82                    | 1.87                      | 2.632(2)                  | 154                  |
| O1-H1...O2   | 0.82                    | 2.25                      | 2.703(2)                  | 115                  |
| O5-H4...O5i  | 0.91(4)                 | 1.99(4)                   | 2.898(2)                  | 178(3)               |
| O5-H3...O2ii | 0.62(4)                 | 2.33(4)                   | 2.938(2)                  | 167(5)               |

Symmetry code: (i)  $x, \frac{1}{2} - y, z + \frac{1}{2}$  (ii)  $-x, -y, -z,$

**Table S6 Atomic coordinates ( $\times 10^4$ ) and equivalent isotropic displacement parameters ( $\text{\AA}^2 \times 10^3$ ) for (Et<sub>4</sub>N) *cis*-[NbO(ca)<sub>2</sub>(H<sub>2</sub>O)OPPh<sub>3</sub>] $\cdot$ 3H<sub>2</sub>O $\cdot$ THF (5). U(eq) is defined as one third of the trace of the orthogonalized U<sup>ij</sup> tensor.**

| Atoms | x          | y          | z          | U(eq)    |
|-------|------------|------------|------------|----------|
| Nb1   | 3333.6(3)  | 1029.4(2)  | 7858.9(2)  | 11.15(8) |
| Cl1A  | 5690.6(14) | 2002.4(7)  | 4622.7(10) | 33.5(3)  |
| Cl1   | -289.0(10) | 1956.1(6)  | 10139.8(9) | 20.5(2)  |
| P1    | 789.1(10)  | 598.2(6)   | 5857.5(8)  | 14.8(2)  |
| O1A   | 4293(3)    | 85.2(16)   | 7222(2)    | 14.1(5)  |
| O3    | 4486(3)    | 1140.2(17) | 8863(2)    | 19.2(6)  |
| O1    | 2460(3)    | 65.4(16)   | 8428(2)    | 14.4(5)  |
| O7    | 1966(3)    | 807.8(16)  | 6525(2)    | 18.3(6)  |
| O2A   | 4454(3)    | 1407.4(16) | 6581(2)    | 16.6(6)  |
| O5A   | 6611(4)    | -760.5(19) | 4344(3)    | 28.3(8)  |
| N1    | 4935(4)    | -1856(2)   | 9729(3)    | 20.7(8)  |
| O4    | -1546(3)   | 547(2)     | 10851(3)   | 27.8(7)  |
| O5    | -1135(3)   | -841.4(19) | 10125(3)   | 28.6(8)  |
| O12   | 2060(5)    | 38(2)      | 1437(3)    | 45.1(11) |
| C3A   | 5590(4)    | 1098(3)    | 5062(3)    | 19.2(8)  |
| O6    | 2976(3)    | 2166.9(17) | 7583(3)    | 20.8(6)  |
| O2    | 1805(3)    | 1381.1(16) | 8781(2)    | 15.1(6)  |
| O4A   | 6728(3)    | 632(2)     | 3637(3)    | 26.6(7)  |
| C111  | 667(4)     | 1216(2)    | 4741(3)    | 19.0(9)  |
| C4A   | 6172(4)    | 528(2)     | 4462(3)    | 17.8(8)  |
| C131  | 882(6)     | -355(3)    | 5445(4)    | 33.1(5)  |
| C122  | -949(5)    | 1411(3)    | 6928(4)    | 31.0(11) |
| C124  | -2636(5)   | 893(4)     | 7941(4)    | 39.4(16) |
| C126  | -1291(5)   | 85(3)      | 6957(4)    | 25.8(10) |
| C6A   | 5416(4)    | -422(2)    | 5808(3)    | 16.1(8)  |
| C35   | 6312(4)    | -2125(3)   | 9779(4)    | 25.1(10) |
| C34   | 3131(5)    | -1716(3)   | 11021(4)   | 33.4(11) |
| C115  | -409(6)    | 1697(4)    | 3145(4)    | 36.7(13) |
| C32   | 5555(6)    | -502(3)    | 10106(5)   | 37.9(13) |
| C2    | 1090(2)    | 868.9(11)  | 9199(2)    | 13.1(8)  |
| C3    | 57(2)      | 1004.4(12) | 9827(2)    | 16.5(7)  |
| C4    | -692(2)    | 417.6(16)  | 10156(2)   | 24.9(10) |
| C5    | -408(2)    | -304.7(13) | 9856(2)    | 20.5(8)  |
| C6    | 624(3)     | -440.2(11) | 9228(2)    | 15.1(8)  |
| C1    | 1373(2)    | 146.6(13)  | 8900(2)    | 15.1(8)  |
| C31   | 4840(5)    | -1042(3)   | 9392(4)    | 29.4(11) |
| C112  | 1655(5)    | 1721(3)    | 4615(4)    | 28.0(10) |
| C5A   | 6083(4)    | -288(2)    | 4868(3)    | 17.8(8)  |
| C39   | 1852(7)    | -146(4)    | 2491(5)    | 48.1(16) |
| C136  | 1793(6)    | -805(3)    | 5973(4)    | 33.1(5)  |
| C2A   | 4988(4)    | 934(2)     | 5977(3)    | 15.0(8)  |
| C113  | 1599(6)    | 2209(3)    | 3764(5)    | 37.7(13) |
| C42   | 2819(7)    | 696(4)     | 1504(5)    | 43.1(14) |
| C135  | 1871(6)    | -1546(3)   | 5728(4)    | 33.1(5)  |

|      |            |            |           |          |
|------|------------|------------|-----------|----------|
| C36  | 6970(5)    | -2116(4)   | 8728(5)   | 35.6(12) |
| C37  | 4105(5)    | -2285(3)   | 8916(4)   | 28.4(10) |
| C121 | -623(4)    | 695(3)     | 6603(3)   | 20.4(9)  |
| C116 | -383(5)    | 1211(3)    | 4005(4)   | 25.7(10) |
| C1A  | 4883(4)    | 148(2)     | 6359(3)   | 13.2(7)  |
| C114 | 578(6)     | 2197(4)    | 3041(4)   | 40.4(14) |
| C41  | 3719(7)    | 636(5)     | 2492(5)   | 53.5(17) |
| C125 | -2304(5)   | 190(4)     | 7633(4)   | 36.9(13) |
| C123 | -1980(6)   | 1499(4)    | 7586(5)   | 41.3(15) |
| C133 | 150(6)     | -1414(3)   | 4424(4)   | 33.1(5)  |
| C38  | 4029(6)    | -3118(3)   | 9092(5)   | 37.6(13) |
| C40  | 3098(8)    | -14(5)     | 3114(5)   | 57(2)    |
| C132 | 43(6)      | -656(3)    | 4674(4)   | 33.1(5)  |
| C134 | 1058(7)    | -1850(3)   | 4945(5)   | 45.0(16) |
| Cl2A | 5352.8(11) | -1322.2(6) | 6276.6(9) | 23.7(2)  |
| Cl2  | 920.6(10)  | -1346.4(6) | 8725.1(8) | 20.1(2)  |
| C33  | 4484(5)    | -1961(3)   | 10852(4)  | 24.9(10) |
| O13  | 4550(4)    | 3027.5(19) | 6609(3)   | 30.5(8)  |
| O14  | 1161(5)    | 3051(2)    | 8074(4)   | 45.9(8)  |
| O15  | 2192(5)    | 4382(3)    | 7703(3)   | 45.9(8)  |

**Table S7 Bond lengths (Å) and angles (°) for (Et<sub>4</sub>N)*cis*-[NbO(ca)<sub>2</sub>(H<sub>2</sub>O)OPPh<sub>3</sub>]<sub>2</sub>·3H<sub>2</sub>O·THF (5).**

| Atoms     | Distance (Å) | Atoms          | Angle (°)  |
|-----------|--------------|----------------|------------|
| Nb1-O1A   | 2.149(3)     | O1A-Nb1-O7     | 82.55(11)  |
| Nb1-O3    | 1.718(3)     | O3-Nb1-O1A     | 92.39(13)  |
| Nb1-O1    | 2.103(3)     | O3-Nb1-O1      | 98.46(13)  |
| Nb1-O7    | 2.192(3)     | O3-Nb1-O7      | 174.93(13) |
| Nb1-O2A   | 2.145(3)     | O3-Nb1-O2A     | 97.15(13)  |
| Nb1-O6    | 2.108(3)     | O3-Nb1-O6      | 96.99(14)  |
| Nb1-O2    | 2.116(3)     | O3-Nb1-O2      | 94.89(13)  |
| Cl1A-C3A  | 1.725(5)     | O1-Nb1-O1A     | 72.07(11)  |
| Cl1-C3    | 1.799(2)     | O1-Nb1-O7      | 80.31(11)  |
| P1-O7     | 1.506(3)     | O1-Nb1-O2A     | 141.15(11) |
| P1-C111   | 1.792(4)     | O1-Nb1-O6      | 141.38(12) |
| P1-C131   | 1.797(5)     | O1-Nb1-O2      | 73.07(11)  |
| P1-C121   | 1.796(5)     | O2A-Nb1-O1A    | 71.93(11)  |
| O1A-C1A   | 1.278(5)     | O2A-Nb1-O7     | 81.03(12)  |
| O1-C1     | 1.316(3)     | O6-Nb1-O1A     | 142.17(11) |
| O2A-C2A   | 1.288(5)     | O6-Nb1-O7      | 86.89(12)  |
| O5A-C5A   | 1.224(5)     | O6-Nb1-O2A     | 70.57(11)  |
| N1-C35    | 1.520(6)     | O6-Nb1-O2      | 70.52(11)  |
| N1-C31    | 1.527(6)     | O2-Nb1-O1A     | 145.06(11) |
| N1-C37    | 1.521(6)     | O2-Nb1-O7      | 89.47(12)  |
| N1-C33    | 1.522(6)     | O2-Nb1-O2A     | 140.32(12) |
| O4-C4     | 1.301(4)     | O7-P1-C111     | 107.95(19) |
| O5-C5     | 1.285(4)     | O7-P1-C131     | 110.3(2)   |
| O12-C39   | 1.394(8)     | O7-P1-C121     | 110.86(19) |
| O12-C42   | 1.427(8)     | C111-P1-C131   | 111.7(2)   |
| C3A-C4A   | 1.428(6)     | C111-P1-C121   | 108.6(2)   |
| C3A-C2A   | 1.370(5)     | C121-P1-C131   | 107.5(3)   |
| O2-C2     | 1.314(3)     | C1A-O1A-Nb1    | 119.9(3)   |
| O4A-C4A   | 1.227(5)     | C1-O1-Nb1      | 117.4(2)   |
| C111-C112 | 1.391(7)     | P1-O7-Nb1      | 163.9(2)   |
| C111-C116 | 1.405(6)     | C2A-O2A-Nb1    | 120.0(3)   |
| C4A-C5A   | 1.559(6)     | C35-N1-C31     | 111.5(4)   |
| C131-C136 | 1.396(8)     | C35-N1-C37     | 112.2(4)   |
| C131-C132 | 1.388(7)     | C35-N1-C33     | 104.8(3)   |
| C122-C121 | 1.400(7)     | C37-N1-C31     | 105.8(4)   |
| C122-C123 | 1.399(7)     | C37-N1-C33     | 111.7(4)   |
| C124-C125 | 1.374(10)    | C33-N1-C31     | 110.9(4)   |
| C124-C123 | 1.375(10)    | C39-O12-C42    | 104.6(5)   |
| C126-C121 | 1.387(7)     | C4A-C3A-Cl1A   | 118.4(3)   |
| C126-C125 | 1.402(7)     | C2A-C3A-Cl1A   | 120.7(3)   |
| C6A-C5A   | 1.422(6)     | C2A-C3A-C4A    | 120.9(4)   |
| C6A-C1A   | 1.372(6)     | C2-O2-Nb1      | 118.0(2)   |
| C6A-Cl2A  | 1.728(4)     | C112-C111-P1   | 118.0(3)   |
| C35-C36   | 1.520(7)     | C112-C111-C116 | 119.5(4)   |
| C34-C33   | 1.508(7)     | C116-C111-P1   | 122.6(4)   |
| C115-C116 | 1.391(7)     | C3A-C4A-C5A    | 118.1(4)   |
| C115-C114 | 1.382(9)     | O4A-C4A-C3A    | 124.6(4)   |

|           |           |                |            |
|-----------|-----------|----------------|------------|
| C32-C31   | 1.501(8)  | O4A-C4A-C5A    | 117.4(4)   |
| C2-C3     | 1.39      | C136-C131-P1   | 117.5(4)   |
| C2-C1     | 1.39      | C132-C131-P1   | 122.3(4)   |
| C3-C4     | 1.39      | C132-C131-C136 | 120.1(5)   |
| C4-C5     | 1.39      | C123-C122-C121 | 118.8(5)   |
| C5-C6     | 1.39      | C125-C124-C123 | 120.2(5)   |
| C6-C1     | 1.39      | C121-C126-C125 | 119.7(5)   |
| C6-Cl2    | 1.782(2)  | C5A-C6A-Cl2A   | 118.1(3)   |
| C112-C113 | 1.385(7)  | C1A-C6A-C5A    | 121.4(4)   |
| C39-C40   | 1.509(10) | C1A-C6A-Cl2A   | 120.4(3)   |
| C136-C135 | 1.373(7)  | N1-C35-C36     | 115.3(4)   |
| C2A-C1A   | 1.499(6)  | C114-C115-C116 | 119.8(5)   |
| C113-C114 | 1.371(9)  | O2-C2-C3       | 125.3(2)   |
| C42-C41   | 1.528(8)  | O2-C2-C1       | 114.5(2)   |
| C135-C134 | 1.385(8)  | C3-C2-C1       | 120.0      |
| C37-C38   | 1.519(8)  | C2-C3-Cl1      | 117.48(15) |
| C41-C40   | 1.566(12) | C4-C3-Cl1      | 122.47(15) |
| C133-C132 | 1.406(7)  | C4-C3-C2       | 120.0      |
| C133-C134 | 1.375(9)  | O4-C4-C3       | 118.6(2)   |
|           |           | O4-C4-C5       | 120.8(2)   |
|           |           | C3-C4-C5       | 120.0      |
|           |           | O5-C5-C4       | 119.7(2)   |
|           |           | O5-C5-C6       | 120.2(2)   |
|           |           | C6-C5-C4       | 120.0      |
|           |           | C5-C6-Cl2      | 121.02(15) |
|           |           | C1-C6-C5       | 120.0      |
|           |           | C1-C6-Cl2      | 118.71(15) |
|           |           | O1-C1-C2       | 115.2(2)   |
|           |           | O1-C1-C6       | 124.1(2)   |
|           |           | C6-C1-C2       | 120.0      |
|           |           | C32-C31-N1     | 115.6(4)   |
|           |           | C113-C112-C111 | 119.9(5)   |
|           |           | O5A-C5A-C4A    | 116.3(4)   |
|           |           | O5A-C5A-C6A    | 125.6(4)   |
|           |           | C6A-C5A-C4A    | 118.1(4)   |
|           |           | O12-C39-C40    | 106.7(6)   |
|           |           | C135-C136-C131 | 120.3(5)   |
|           |           | O2A-C2A-C3A    | 125.6(4)   |
|           |           | O2A-C2A-C1A    | 113.2(3)   |
|           |           | C3A-C2A-C1A    | 121.1(4)   |
|           |           | C114-C113-C112 | 120.5(5)   |
|           |           | O12-C42-C41    | 108.0(5)   |
|           |           | C136-C135-C134 | 120.2(6)   |
|           |           | C38-C37-N1     | 115.8(4)   |
|           |           | C122-C121P1    | 117.4(4)   |
|           |           | C126-C121-P1   | 122.0(4)   |
|           |           | C126-C121-C122 | 120.1(4)   |
|           |           | C115-C116-C111 | 119.7(5)   |
|           |           | O1A-C1A-C6A    | 125.9(4)   |
|           |           | O1A-C1A-C2A    | 113.7(3)   |
|           |           | C6A-C1A-C2A    | 120.4(4)   |
|           |           | C113-C114-C115 | 120.7(5)   |
|           |           | C42-C41-C40    | 101.9(6)   |
|           |           | C124-C125-C126 | 120.3(5)   |

|                |          |
|----------------|----------|
| C124-C123-C122 | 120.9(6) |
| C134-C133-C132 | 120.5(5) |
| C39-C40-C41    | 103.1(5) |
| C131-C132-C133 | 118.8(5) |
| C133-C134-C135 | 120.2(5) |
| C34-C33-N1     | 115.4(4) |

**Table S8 Anisotropic displacement parameters ( $\text{\AA}^2 \times 10^3$ ) for  $(\text{Et}_4\text{N})\text{cis}[\text{NbO}(\text{ca})_2(\text{H}_2\text{O})\text{OPPh}_3]\cdot 3\text{H}_2\text{O}\cdot \text{THF}$  (5). The anisotropic displacement factor exponent takes the form:  $-2\pi^2[\text{h}^2\text{a}^{*2}\text{U}_{11} + \dots + 2\text{h k a}^* \text{b}^* \text{U}_{12}]$ .**

| Atoms | U <sub>11</sub> | U <sub>22</sub> | U <sub>33</sub> | U <sub>23</sub> | U <sub>13</sub> | U <sub>12</sub> |
|-------|-----------------|-----------------|-----------------|-----------------|-----------------|-----------------|
| Nb1   | 11.07(14)       | 9.73(14)        | 12.85(14)       | -0.70(13)       | 2.78(10)        | -0.40(14)       |
| Cl1A  | 53.1(8)         | 18.6(5)         | 30.5(6)         | 4.0(5)          | 21.9(6)         | -6.5(5)         |
| Cl1   | 22.9(5)         | 15.9(5)         | 23.4(5)         | -3.8(4)         | 7.1(4)          | 3.5(4)          |
| P1    | 14.4(5)         | 16.5(5)         | 13.5(4)         | 0.5(4)          | -0.6(4)         | -0.1(4)         |
| O1A   | 13.9(13)        | 11.8(13)        | 16.9(14)        | 0.4(11)         | 3.6(11)         | 0.9(11)         |
| O3    | 17.9(13)        | 20.3(17)        | 19.4(13)        | -3.1(12)        | 1.1(11)         | 0.3(12)         |
| O1    | 12.0(13)        | 13.4(13)        | 18.3(14)        | 0.9(11)         | 5.4(11)         | 0.9(10)         |
| O7    | 19.5(15)        | 15.6(14)        | 19.2(14)        | 0.5(11)         | -3.6(12)        | -0.7(11)        |
| O2A   | 17.3(14)        | 14.0(14)        | 19.4(14)        | -1.3(11)        | 9.2(11)         | -1.8(11)        |
| O5A   | 34.0(19)        | 25.5(18)        | 26.7(17)        | -5.3(14)        | 14.2(14)        | 4.3(15)         |
| N1    | 22.1(19)        | 22.6(19)        | 17.2(18)        | 6.6(15)         | -0.8(14)        | 4.8(15)         |
| O4    | 26.5(17)        | 29.8(18)        | 28.8(17)        | 1.5(14)         | 18.7(14)        | -1.9(14)        |
| O5    | 29.1(18)        | 22.9(17)        | 35.3(19)        | -0.2(14)        | 16.5(15)        | -9.9(14)        |
| O12   | 61(3)           | 41(2)           | 32(2)           | -2.9(18)        | -9(2)           | 6(2)            |
| C3A   | 24.2(19)        | 13.1(19)        | 21.0(18)        | -1.1(17)        | 6.8(15)         | -1.7(18)        |
| O6    | 23.5(16)        | 11.9(14)        | 27.9(16)        | 4.5(12)         | 12.0(13)        | 2.3(12)         |
| O2    | 14.6(14)        | 12.0(13)        | 19.2(14)        | -0.9(11)        | 7.6(11)         | -1.1(11)        |
| O4A   | 29.4(18)        | 30.9(18)        | 20.6(15)        | -3.9(14)        | 12.3(13)        | -6.9(15)        |
| C111  | 19(2)           | 24(2)           | 14.4(17)        | 3.1(14)         | 1.3(15)         | 4.3(15)         |
| C4A   | 16.6(19)        | 20(2)           | 17.1(18)        | -3.4(16)        | 2.6(15)         | -4.7(16)        |
| C131  | 42.3(13)        | 23.7(12)        | 32.4(12)        | -4.3(9)         | -6.5(10)        | -6.9(10)        |
| C122  | 32(3)           | 34(3)           | 28(3)           | 1(2)            | 7(2)            | 8(2)            |
| C124  | 17(2)           | 78(5)           | 24(2)           | -2(3)           | 2.8(17)         | 8(3)            |
| C126  | 21(2)           | 37(3)           | 20(2)           | 5.7(19)         | 1.0(17)         | -5(2)           |
| C6A   | 17.5(19)        | 11.7(18)        | 19.4(19)        | -0.1(15)        | 2.7(15)         | -0.9(15)        |
| C35   | 19(2)           | 30(2)           | 26(2)           | 7.7(19)         | -2.7(17)        | 9.1(18)         |
| C34   | 33(3)           | 36(3)           | 32(3)           | 4(2)            | 9(2)            | 5(2)            |
| C115  | 35(3)           | 51(3)           | 24(2)           | 5(2)            | -7(2)           | 14(3)           |
| C32   | 38(3)           | 23(3)           | 53(3)           | 7(2)            | 2(3)            | 3(2)            |
| C2    | 13.6(17)        | 16(2)           | 9.8(15)         | 0.2(13)         | -1.0(13)        | -4.0(13)        |
| C3    | 16.0(16)        | 17.2(17)        | 16.5(16)        | -5.5(19)        | 2.7(13)         | 6.4(19)         |
| C4    | 16(2)           | 33(3)           | 26(2)           | 10.5(19)        | 4.4(17)         | 3.7(18)         |
| C5    | 18(2)           | 27(2)           | 16.2(19)        | 3.5(17)         | 3.3(15)         | -0.5(18)        |
| C6    | 14.3(18)        | 12.5(18)        | 18.6(19)        | 1.8(15)         | 0.7(15)         | -0.7(15)        |
| C1    | 14.9(18)        | 19(2)           | 10.9(17)        | -0.4(15)        | 1.0(14)         | 0.1(15)         |
| C31   | 28(2)           | 25(2)           | 36(3)           | 13(2)           | 6(2)            | 10(2)           |
| C112  | 21(2)           | 32(3)           | 31(3)           | 10(2)           | 1.6(19)         | -1.5(19)        |
| C5A   | 17.3(19)        | 19(2)           | 17.3(19)        | -3.8(16)        | 2.2(15)         | -2.3(16)        |
| C39   | 51(4)           | 54(4)           | 40(3)           | -1(3)           | 3(3)            | 17(3)           |
| C136  | 42.3(13)        | 23.7(12)        | 32.4(12)        | -4.3(9)         | -6.5(10)        | -6.9(10)        |
| C2A   | 11.4(16)        | 14(2)           | 19.2(17)        | -2.6(15)        | 1.2(13)         | -2.7(15)        |
| C113  | 33(3)           | 40(3)           | 40(3)           | 21(2)           | 9(2)            | 0(2)            |
| C42   | 49(4)           | 41(3)           | 38(3)           | -7(3)           | -10(3)          | 2(3)            |
| C135  | 42.3(13)        | 23.7(12)        | 32.4(12)        | -4.3(9)         | -6.5(10)        | -6.9(10)        |
| C36   | 27(3)           | 44(3)           | 37(3)           | 7(2)            | 8(2)            | 9(2)            |

|      |          |          |          |          |          |          |
|------|----------|----------|----------|----------|----------|----------|
| C37  | 25(2)    | 35(3)    | 25(2)    | 3(2)     | -5.1(19) | 8(2)     |
| C121 | 15(2)    | 32(2)    | 13.9(19) | 1.9(17)  | -1.3(15) | 2.5(18)  |
| C116 | 22(2)    | 32(3)    | 23(2)    | 3.8(17)  | -2.7(17) | 2.0(17)  |
| C1A  | 10.7(17) | 13.4(18) | 15.5(18) | 1.4(15)  | 0.6(14)  | -0.7(14) |
| C114 | 42(3)    | 52(4)    | 29(3)    | 20(3)    | 11(2)    | 17(3)    |
| C41  | 58(4)    | 63(4)    | 37(3)    | -1(3)    | -21(3)   | 2(4)     |
| C125 | 18(2)    | 65(4)    | 27(3)    | 12(3)    | 0(2)     | -10(3)   |
| C123 | 37(3)    | 58(4)    | 30(3)    | -6(3)    | 6(2)     | 21(3)    |
| C133 | 42.3(13) | 23.7(12) | 32.4(12) | -4.3(9)  | -6.5(10) | -6.9(10) |
| C38  | 36(3)    | 37(3)    | 38(3)    | -4(2)    | -9(2)    | -3(2)    |
| C40  | 65(5)    | 81(6)    | 25(3)    | 5(3)     | -8(3)    | 25(4)    |
| C132 | 42.3(13) | 23.7(12) | 32.4(12) | -4.3(9)  | -6.5(10) | -6.9(10) |
| C134 | 78(5)    | 22(3)    | 35(3)    | -10(2)   | 2(3)     | -12(3)   |
| Cl2A | 33.5(6)  | 13.6(4)  | 24.7(5)  | -0.6(4)  | 7.8(4)   | 5.6(4)   |
| Cl2  | 22.0(5)  | 12.9(4)  | 25.8(5)  | -1.4(4)  | 4.6(4)   | -1.7(4)  |
| C33  | 29(2)    | 23(2)    | 23(2)    | 5.8(18)  | 2.8(19)  | 4.3(19)  |
| O13  | 46(2)    | 16.2(16) | 30.8(18) | 4.8(13)  | 14.9(16) | -0.7(15) |
| O14  | 70(2)    | 35.5(16) | 34.8(15) | -1.2(12) | 27.1(15) | -0.8(15) |
| O15  | 70(2)    | 35.5(16) | 34.8(15) | -1.2(12) | 27.1(15) | -0.8(15) |

**Table S9 Hydrogen coordinates ( $\times 10^4$ ) and isotropic displacement parameters ( $\text{\AA}^2 \times 10^3$ ) for  $(\text{Et}_4\text{N})\text{cis-}[\text{NbO}(\text{ca})_2(\text{H}_2\text{O})\text{OPPh}_3]\cdot 3\text{H}_2\text{O}\cdot \text{THF}$  (5).**

| Atoms | x        | y        | z        | U(eq) |
|-------|----------|----------|----------|-------|
| H6A   | 2379.48  | 2433.31  | 7815.08  | 31    |
| H6B   | 3393.87  | 2459.41  | 7198.88  | 31    |
| H122  | -479.85  | 1830.61  | 6705.17  | 37    |
| H124  | -3321.52 | 960.66   | 8400.7   | 47    |
| H126  | -1064.29 | -401.06  | 6742.64  | 31    |
| H35A  | 6330.52  | -2639.54 | 10058.03 | 30    |
| H35B  | 6811.05  | -1811.71 | 10294.08 | 30    |
| H34A  | 2927.92  | -1804.04 | 11762.52 | 50    |
| H34B  | 3045.24  | -1184.93 | 10859.8  | 50    |
| H34C  | 2539.6   | -1998.84 | 10549.42 | 50    |
| H115  | -1104.06 | 1686.07  | 2632.2   | 44    |
| H32A  | 5436.49  | 2.57     | 9825.31  | 57    |
| H32B  | 5228.73  | -528.1   | 10822.77 | 57    |
| H32C  | 6467.7   | -626.04  | 10137.31 | 57    |
| H31A  | 5162.17  | -996.38  | 8667.93  | 35    |
| H31B  | 3926.42  | -898.69  | 9351.6   | 35    |
| H112  | 2366.18  | 1730.93  | 5111.83  | 34    |
| H39A  | 1593.01  | -673.12  | 2544.47  | 58    |
| H39B  | 1167.82  | 168.41   | 2769.11  | 58    |
| H136  | 2361.64  | -597.22  | 6503.08  | 40    |
| H113  | 2272.44  | 2555.1   | 3680.51  | 45    |
| H42A  | 2262.83  | 1138     | 1558.48  | 52    |
| H42B  | 3319.39  | 748.07   | 859.63   | 52    |
| H135  | 2484.31  | -1851.43 | 6097.22  | 40    |
| H36A  | 7848.89  | -2297.92 | 8838.91  | 53    |
| H36B  | 6502.63  | -2437.08 | 8215.81  | 53    |
| H36C  | 6984.3   | -1607.29 | 8452.42  | 53    |
| H37A  | 3227.02  | -2079.3  | 8912.94  | 34    |
| H37B  | 4435.38  | -2195.84 | 8202.99  | 34    |
| H116  | -1072.66 | 876.73   | 4093.35  | 31    |
| H114  | 550.36   | 2535.81  | 2461.1   | 49    |
| H41A  | 3733.41  | 1101.7   | 2909.28  | 64    |
| H41B  | 4600.09  | 510.67   | 2300.63  | 64    |
| H125  | -2761.32 | -227.05  | 7878.17  | 44    |
| H123  | -2228.85 | 1983.59  | 7791.18  | 50    |
| H133  | -408.85  | -1626.54 | 3890.19  | 40    |
| H38A  | 3474.42  | -3341.26 | 8530.3   | 56    |
| H38B  | 4886.95  | -3333.37 | 9074.19  | 56    |
| H38C  | 3675.27  | -3216.51 | 9786.08  | 56    |
| H40A  | 3644.65  | -463.14  | 3119.73  | 69    |
| H40B  | 2947.82  | 131.96   | 3855.99  | 69    |
| H132  | -592.25  | -355.93  | 4323.02  | 40    |
| H134  | 1126.91  | -2360.53 | 4767.37  | 54    |
| H33A  | 4561.1   | -2493.18 | 11039.36 | 30    |
| H33B  | 5065.53  | -1681.22 | 11349    | 30    |
| H13A  | 4160.37  | 3349.87  | 6220.95  | 46    |

|      |         |         |         |          |
|------|---------|---------|---------|----------|
| H13B | 4893.1  | 2739.17 | 6169.72 | 46       |
| H14A | 1479.52 | 3477.43 | 7967.07 | 69       |
| H14B | 742.83  | 3104.13 | 8632.14 | 69       |
| H15A | 2024.99 | 4737.2  | 8109.61 | 380(160) |
| H15B | 2576.69 | 4544.19 | 7203.1  | 160(60)  |

Table S10 Torsion angles (°) for (Et<sub>4</sub>N)*cis*-[NbO(ca)<sub>2</sub>(H<sub>2</sub>O)OPPh<sub>3</sub>] $\cdot$ 3H<sub>2</sub>O $\cdot$ THF (5).

| Torsion angles      | Angle (°)  | Torsion angles      | Angle (°) |
|---------------------|------------|---------------------|-----------|
| Nb1-O1A-C1A-C6A     | -172.6(3)  | C2-C3-C4-O4         | 171.3(3)  |
| Nb1-O1A-C1A-C2A     | 8.7(4)     | C2-C3-C4-C5         | 0.0       |
| Nb1-O1-C1-C2        | -15.2(3)   | C3-C2-C1-O1         | -171.4(3) |
| Nb1-O1-C1-C6        | 173.79(14) | C3-C2-C1-C6         | 0.0       |
| Nb1-O2A-C2A-C3A     | 171.4(3)   | C3-C4-C5-O5         | -177.1(3) |
| Nb1-O2A-C2A-C1A     | -7.8(4)    | C3-C4-C5-C6         | 0.0       |
| Nb1-O2-C2-C3        | 179.63(15) | C4-C5-C6-C1         | 0.0       |
| Nb1-O2-C2-C1        | -5.3(3)    | C4-C5-C6-Cl2        | -173.9(2) |
| Cl1A-C3A-C4A-O4A    | -1.3(6)    | C5-C6-C1-O1         | 170.6(3)  |
| Cl1A-C3A-C4A-C5A    | 179.7(3)   | C5-C6-C1-C2         | 0.0       |
| Cl1A-C3A-C2A-O2A    | 0.2(6)     | C1-C2-C3-Cl1        | -177.6(2) |
| Cl1A-C3A-C2A-C1A    | 179.3(3)   | C1-C2-C3-C4         | 0.0       |
| Cl1-C3-C4-O4        | -11.2(3)   | C31-N1-C35-C36      | -62.9(6)  |
| Cl1-C3-C4-C5        | 177.5(2)   | C31-N1-C37-C38      | -179.2(4) |
| P1-C111-C112-C113   | -179.9(4)  | C31-N1-C33-C34      | 58.3(6)   |
| P1-C111-C116-C115   | -179.0(4)  | C112-C111-C116-C115 | 1.6(7)    |
| P1-C131-C136-C135   | 176.9(5)   | C112-C113-C114-C115 | -0.2(9)   |
| P1-C131-C132-C133   | -177.7(4)  | C5A-C6A-C1A-O1A     | -178.3(4) |
| O7-P1-C111-C112     | 4.8(4)     | C5A-C6A-C1A-C2A     | 0.3(6)    |
| O7-P1-C111-C116     | -174.7(4)  | C39-O12-C42-C41     | 35.3(7)   |
| O7-P1-C131-C136     | 15.2(5)    | C136-C131-C132-C133 | -1.4(9)   |
| O7-P1-C131-C132     | -168.4(5)  | C136-C135-C134-C133 | -1.4(10)  |
| O7-P1-C121-C122     | 64.8(4)    | C2A-C3A-C4A-O4A     | -179.9(4) |
| O7-P1-C121-C126     | -107.8(4)  | C2A-C3A-C4A-C5A     | 1.1(6)    |
| O2A-C2A-C1A-O1A     | -0.6(5)    | C42-O12-C39-C40     | -41.0(7)  |
| O2A-C2A-C1A-C6A     | -179.3(4)  | C42-C41-C40-C39     | -8.3(7)   |
| O4-C4-C5-O5         | 11.8(4)    | C37-N1-C35-C36      | 55.6(6)   |
| O4-C4-C5-C6         | -171.1(3)  | C37-N1-C31-C32      | 178.0(4)  |
| O5-C5-C6-C1         | 177.1(3)   | C37-N1-C33-C34      | -59.5(5)  |
| O5-C5-C6-Cl2        | 3.2(3)     | C121-P1-O7-Nb1      | 24.5(8)   |
| O12-C39-C40-C41     | 30.3(7)    | C121-P1-C111-C112   | 125.0(4)  |
| O12-C42-C41-C40     | -15.4(7)   | C121-P1-C111-C116   | -54.5(4)  |
| C3A-C4A-C5A-O5A     | -178.9(4)  | C121-P1-C131-C136   | -105.8(5) |
| C3A-C4A-C5A-C6A     | 0.6(6)     | C121-P1-C131-C132   | 70.6(5)   |
| C3A-C2A-C1A-O1A     | -179.8(4)  | C121-C122-C123-C124 | 2.2(8)    |
| C3A-C2A-C1A-C6A     | 1.4(6)     | C121-C126-C125-C124 | 0.2(8)    |
| O2-C2-C3-Cl1        | -2.8(3)    | C116-C111-C112-C113 | -0.4(8)   |
| O2-C2-C3-C4         | 174.9(3)   | C116-C115-C114-C113 | 1.3(9)    |
| O2-C2-C1-O1         | 13.2(3)    | C1A-C6A-C5A-O5A     | 178.2(4)  |
| O2-C2-C1-C6         | -175.4(3)  | C1A-C6A-C5A-C4A     | -1.3(6)   |
| O4A-C4A-C5A-O5A     | 2.1(6)     | C114-C115-C116-C111 | -2.0(8)   |
| O4A-C4A-C5A-C6A     | -178.5(4)  | C125-C124-C123-C122 | -1.4(8)   |
| C111-P1-O7-Nb1      | 143.3(7)   | C125-C126-C121-P1   | 173.1(4)  |
| C111-P1-C131-C136   | 135.2(5)   | C125-C126-C121-C122 | 0.7(7)    |
| C111-P1-C131-C132   | -48.4(6)   | C123-C122-C121-P1   | -174.6(4) |
| C111-P1-C121-C122   | -53.6(4)   | C123-C122-C121-C126 | -1.8(8)   |
| C111-P1-C121-C126   | 133.8(4)   | C123-C124-C125-C126 | 0.2(8)    |
| C111-C112-C113-C114 | -0.3(9)    | C132-C131-C136-C135 | 0.5(9)    |
| C4A-C3A-C2A-O2A     | 178.8(4)   | C132-C133-C134-C135 | 0.4(10)   |
| C4A-C3A-C2A-C1A     | -2.1(6)    | C134-C133-C132-C131 | 1.0(9)    |

|                     |           |                  |           |
|---------------------|-----------|------------------|-----------|
| C131-P1-O7-Nb1      | -94.4(7)  | Cl2A-C6A-C5A-O5A | 1.1(6)    |
| C131-P1-C111-C112   | -116.6(4) | Cl2A-C6A-C5A-C4A | -178.3(3) |
| C131-P1-C111-C116   | 63.9(5)   | Cl2A-C6A-C1A-O1A | -1.3(6)   |
| C131-P1-C121-C122   | -174.6(4) | Cl2A-C6A-C1A-C2A | 177.3(3)  |
| C131-P1-C121-C126   | 12.8(5)   | Cl2-C6-C1-O1     | -15.4(3)  |
| C131-C136-C135-C134 | 0.9(9)    | Cl2-C6-C1-C2     | 174.0(2)  |
| C35-N1-C31-C32      | -59.8(6)  | C33-N1-C35-C36   | 177.0(5)  |
| C35-N1-C37-C38      | 59.0(6)   | C33-N1-C31-C32   | 56.7(6)   |
| C35-N1-C33-C34      | 178.8(4)  | C33-N1-C37-C38   | -58.4(6)  |

**Table S11 General hydrogen-bond distances (Å) and angles (°) of (Et<sub>4</sub>N)*cis*-[NbO(ca)<sub>2</sub>(H<sub>2</sub>O)OPPh<sub>3</sub>]. 3H<sub>2</sub>O·THF (5).**

| Interactions | D-H...A                     | D-H(Å)  | H...A (Å) | D...A (Å) | D-H...A (°) |
|--------------|-----------------------------|---------|-----------|-----------|-------------|
| I            | O13-H1...Cl5                | 0.87(4) | 2.52(4)   | 3.370(2)  | 166(3)      |
| II           | O13-H1...O4                 | 0.87(4) | 2.47(4)   | 2.921(3)  | 113(3)      |
| III          | O13-H2...O9 <sup>a</sup>    | 0.86(4) | 1.89(4)   | 2.739(3)  | 171(3)      |
| IV           | O14-H4...O15 <sup>a</sup>   | 0.85(3) | 1.85(3)   | 2.673(4)  | 165(5)      |
| V            | O15-H5...O8                 | 0.81(3) | 2.35(3)   | 3.062(3)  | 147(3)      |
| VI           | O15-H5...O9                 | 0.81(3) | 2.24(3)   | 2.922(3)  | 142(3)      |
| VII          | O5-H5A...O14                | 0.92(3) | 1.69(3)   | 2.577(3)  | 163(3)      |
| VIII         | O5-H5B...O13                | 0.84(4) | 2.79(4)   | 2.608(3)  | 165(4)      |
| IX           | O15-H6...O10 <sup>b</sup>   | 0.85(4) | 2.05(4)   | 2.890(3)  | 175(5)      |
| X            | C14-H14...O6                | 0.93    | 2.49      | 2.918(3)  | 108         |
| XI           | C18-H18...O8 <sup>c</sup>   | 0.93    | 2.40      | 3.212(4)  | 145         |
| XII          | C22-H22...O7 <sup>c</sup>   | 0.93    | 2.44      | 3.314(4)  | 157         |
| XIII         | C30-H30...O3                | 0.93    | 2.52      | 3.394(3)  | 156         |
| XIV          | C30-H30...O6                | 0.93    | 2.57      | 2.985(3)  | 108         |
| XV           | C31-H31B...O2 <sup>d</sup>  | 0.97    | 2.57      | 3.374(4)  | 140         |
| XVI          | C33-H32A...O7 <sup>d</sup>  | 0.96    | 2.57      | 3.500(4)  | 163         |
| XVII         | C32-H32B...O11 <sup>e</sup> | 0.96    | 2.56      | 3.522(4)  | 175         |
| XVIII        | C34-H34C...O12 <sup>f</sup> | 0.96    | 2.57      | 3.403(4)  | 146         |
| XIX          | C37-H37A...Cl3 <sup>d</sup> | 0.97    | 2.78      | 3.740(3)  | 172         |

Symmetry code: (a) -x+1, y+1/2, -z+1 (b), x+1, y, z - 1 (c), x-1, y, z (d), x, y+1, (e), x+1, y+1, z (f), -x+1, y+1/2, -z+2

**Table S12 Atomic coordinates ( $\times 10^4$ ) and equivalent isotropic displacement parameters ( $\text{\AA}^2 \times 10^3$ ) for  $(\text{Et}_4\text{N})_4[\text{Nb}_4\text{O}_4(\text{ca})_2(\mu^2\text{-O})_2\text{Cl}_8]\cdot 2\text{CH}_3\text{CN}$  (6).  $U(\text{eq})$  is defined as one third of the trace of the orthogonalized  $U^{ij}$  tensor.**

| Atoms | x          | y         | z          | U(eq)     |
|-------|------------|-----------|------------|-----------|
| Nb2B  | 3987.7(4)  | 5243.7(9) | 3566.7(3)  | 16.95(19) |
| Nb2A  | 1048.0(4)  | 6433.6(9) | 1423.6(3)  | 16.09(19) |
| Nb1A  | 2451.9(4)  | 6477.5(9) | 3963.3(3)  | 16.76(19) |
| Nb3B  | 2426.4(4)  | 4522.2(9) | 1069.3(3)  | 19.4(2)   |
| Cl4A  | 2413.0(11) | 9003(2)   | 2476.4(8)  | 21.4(5)   |
| Cl4B  | 3832.4(12) | 7492(2)   | 2108.7(8)  | 23.6(5)   |
| Cl3A  | 1148.2(12) | 3799(2)   | 2901.4(8)  | 21.2(5)   |
| Cl3B  | 2561.5(12) | 2290(2)   | 2534.4(9)  | 23.0(5)   |
| Cl5A  | 180.4(11)  | 7141(2)   | 1850.8(8)  | 22.0(5)   |
| Cl6A  | 363.0(13)  | 4959(2)   | 1079.7(9)  | 26.7(6)   |
| Cl1B  | 4057.1(13) | 3652(3)   | 4102.3(9)  | 29.8(6)   |
| Cl2B  | 4768.2(13) | 4076(3)   | 3169.0(10) | 30.0(6)   |
| Cl1A  | 1423.8(13) | 7479(3)   | 3964.9(10) | 32.6(6)   |
| Cl2A  | 2880.0(15) | 8287(3)   | 4305.9(10) | 34.5(7)   |
| Cl5B  | 3498.1(13) | 3793(3)   | 1026.8(11) | 37.5(7)   |
| Cl6B  | 2557.2(15) | 5754(3)   | 445.3(10)  | 37.0(7)   |
| O5A   | 1611(3)    | 7394(7)   | 1892(2)    | 17.1(14)  |
| O4A   | 1163(3)    | 5178(7)   | 2059(2)    | 18.7(14)  |
| O2A   | 1982(3)    | 5374(7)   | 3480(2)    | 19.9(15)  |
| O3A   | 2462(3)    | 7565(7)   | 3297(2)    | 20.4(15)  |
| O5B   | 2990(3)    | 5912(7)   | 1548(2)    | 19.1(14)  |
| O3B   | 3823(4)    | 6139(7)   | 2962(2)    | 21.2(15)  |
| O4B   | 2496(3)    | 3733(7)   | 1701(2)    | 20.1(15)  |
| O2B   | 3327(3)    | 3968(7)   | 3116(2)    | 18.0(14)  |
| O1B   | 4482(4)    | 6368(8)   | 3765(2)    | 25.9(16)  |
| N6D   | 707(4)     | 1242(8)   | 1686(3)    | 21.7(18)  |
| N5D   | 1321(4)    | 1902(8)   | 4334(3)    | 21.4(18)  |
| O1A   | 2355(4)    | 5480(8)   | 4385(2)    | 25.5(16)  |
| O6B   | 2047(4)    | 3247(8)   | 851(3)     | 29.9(18)  |
| O1C   | 3221(3)    | 5878(7)   | 3753(2)    | 22.4(15)  |
| O6A   | 1024(4)    | 7682(8)   | 1069(3)    | 27.0(17)  |
| O2C   | 1755(3)    | 5524(8)   | 1260(2)    | 25.4(16)  |
| N3D   | 4360(4)    | 9880(8)   | 3267(3)    | 22.7(19)  |
| C1A   | 1879(4)    | 5767(9)   | 3097(3)    | 14.3(17)  |
| C5A   | 2074(4)    | 7571(9)   | 2578(3)    | 13.8(17)  |
| C2A   | 1528(4)    | 5160(9)   | 2784(3)    | 15.5(18)  |
| C5B   | 3446(4)    | 6141(9)   | 2242(3)    | 17.9(19)  |
| C4A   | 1728(4)    | 6964(9)   | 2269(3)    | 14.6(18)  |
| C3A   | 1459(4)    | 5679(9)   | 2367(3)    | 14.5(18)  |
| C1B   | 3228(4)    | 4365(9)   | 2747(3)    | 16.7(18)  |
| C6A   | 2172(4)    | 7048(9)   | 2995(3)    | 13.5(17)  |
| C4B   | 3085(4)    | 5500(10)  | 1919(3)    | 17.6(19)  |
| C6B   | 3522(4)    | 5644(9)   | 2649(3)    | 13.5(17)  |
| C30D  | 937(5)     | 511(11)   | 2459(4)    | 28(2)     |

|      |          |           |         |          |
|------|----------|-----------|---------|----------|
| C2B  | 2881(4)  | 3752(9)   | 2420(3) | 16.5(18) |
| C7D  | 3709(5)  | 9368(11)  | 3331(4) | 25(2)    |
| C11D | 4736(5)  | 8800(9)   | 3095(4) | 21(2)    |
| C12D | 5397(5)  | 9124(13)  | 3014(5) | 36(3)    |
| C35D | 429(6)   | 727(11)   | 1264(4) | 29(2)    |
| N4D  | 3748(7)  | 5521(15)  | 5599(5) | 59(2)    |
| C28D | 1378(7)  | 807(13)   | 3598(4) | 39(3)    |
| C8D  | 3243(5)  | 10347(13) | 3485(4) | 34(3)    |
| C3B  | 2804(5)  | 4222(10)  | 2017(3) | 18.4(19) |
| C36D | 361(6)   | 1644(13)  | 898(4)  | 36(3)    |
| C33D | 1360(5)  | 1739(12)  | 1617(4) | 30(3)    |
| C1D  | 1404(9)  | 9167(18)  | 202(5)  | 55(5)    |
| C9D  | 4651(6)  | 10384(13) | 3681(4) | 38(3)    |
| C6D  | 4069(7)  | 10691(13) | 2514(4) | 39(3)    |
| C31D | 342(6)   | 2363(12)  | 1845(4) | 29(2)    |
| C5D  | 4336(6)  | 10992(11) | 2962(4) | 33(3)    |
| C27D | 1386(6)  | 686(11)   | 4085(4) | 32(3)    |
| C10D | 4741(7)  | 9422(16)  | 4032(5) | 48(4)    |
| C29D | 726(8)   | 150(15)   | 2006(5) | 50.8(15) |
| C14D | 4203(7)  | 7549(13)  | 5907(5) | 43(3)    |
| C25D | 681(6)   | 2421(13)  | 4224(4) | 34(3)    |
| C23D | 1394(8)  | 1622(17)  | 4805(5) | 53(2)    |
| C34D | 1817(6)  | 804(14)   | 1446(4) | 40(3)    |
| C17D | 3120(7)  | 4962(15)  | 5458(6) | 50.8(15) |
| N1D  | 1476(7)  | 10210(16) | 287(5)  | 59(2)    |
| C19D | 4095(7)  | 4672(16)  | 5915(5) | 50.8(15) |
| C21D | 1791(7)  | 2891(16)  | 4203(6) | 53(2)    |
| C32D | -320(6)  | 2043(15)  | 1953(4) | 42(3)    |
| N2D  | 5212(7)  | 7986(15)  | 4991(5) | 59(2)    |
| C15D | 4186(8)  | 5574(15)  | 5225(5) | 47(4)    |
| C18D | 3100(7)  | 3740(15)  | 5252(5) | 50.8(15) |
| C2D  | 1308(12) | 7886(19)  | 100(5)  | 76(7)    |
| C26D | 501(7)   | 3609(15)  | 4462(5) | 48(4)    |
| C3D  | 5625(8)  | 8649(15)  | 5028(5) | 50(4)    |
| C24D | 918(8)   | 745(16)   | 4992(6) | 53(2)    |
| C4D  | 6158(8)  | 9490(20)  | 5077(7) | 79(7)    |
| C13D | 3643(7)  | 6794(15)  | 5764(6) | 50.8(15) |
| C22D | 2443(7)  | 2404(16)  | 4229(6) | 53(2)    |
| C20D | 3764(7)  | 4431(16)  | 6341(5) | 50.8(15) |
| C16D | 3925(7)  | 6367(16)  | 4852(5) | 50.8(15) |

**Table S13 Bond lengths (Å) and angles (°) for (Et<sub>4</sub>N)<sub>4</sub>[Nb<sub>4</sub>O<sub>4</sub>(ca)<sub>2</sub>(μ<sup>2</sup>-O)<sub>2</sub>Cl<sub>8</sub>]·2CH<sub>3</sub>CN (6).**

| Atoms     | Distance (Å) | Atoms          | Angle (°) |
|-----------|--------------|----------------|-----------|
| Nb2B-Cl1B | 2.383(3)     | Cl1B-Nb2B-Cl2B | 88.12(11) |
| Nb2B-Cl2B | 2.469(3)     | Cl1B-Nb2B-O2B  | 91.57(19) |
| Nb2B-O3B  | 2.132(7)     | O3B-Nb2B-Cl1B  | 160.6(2)  |
| Nb2B-O2B  | 2.390(7)     | O3B-Nb2B-Cl2B  | 82.8(2)   |
| Nb2B-O1B  | 1.705(8)     | O3B-Nb2B-O2B   | 70.0(3)   |
| Nb2B-O1C  | 1.900(8)     | O2B-Nb2B-Cl2B  | 79.66(19) |
| Nb2A-Cl5A | 2.459(3)     | O1B-Nb2B-Cl1B  | 103.0(3)  |
| Nb2A-Cl6A | 2.386(3)     | O1B-Nb2B-Cl2B  | 96.1(3)   |
| Nb2A-O5A  | 2.129(7)     | O1B-Nb2B-O3B   | 95.0(3)   |
| Nb2A-O4A  | 2.398(7)     | O1B-Nb2B-O2B   | 164.8(3)  |
| Nb2A-O6A  | 1.731(8)     | O1B-Nb2B-O1C   | 100.3(4)  |
| Nb2A-O2C  | 1.896(7)     | O1C-Nb2B-Cl1B  | 94.1(2)   |
| Nb1A-Cl1A | 2.464(3)     | O1C-Nb2B-Cl2B  | 162.4(2)  |
| Nb1A-Cl2A | 2.376(3)     | O1C-Nb2B-O3B   | 89.6(3)   |
| Nb1A-O2A  | 2.139(7)     | O1C-Nb2B-O2B   | 82.8(3)   |
| Nb1A-O3A  | 2.381(7)     | Cl6A-Nb2A-Cl5A | 88.49(10) |
| Nb1A-O1A  | 1.711(8)     | Cl6A-Nb2A-O4A  | 92.67(18) |
| Nb1A-O1C  | 1.919(8)     | O5A-Nb2A-Cl5A  | 84.68(19) |
| Nb3B-Cl5B | 2.450(3)     | O5A-Nb2A-Cl6A  | 162.6(2)  |
| Nb3B-Cl6B | 2.375(3)     | O5A-Nb2A-O4A   | 70.3(2)   |
| Nb3B-O5B  | 2.402(7)     | O4A-Nb2A-Cl5A  | 77.29(19) |
| Nb3B-O4B  | 2.142(7)     | O6A-Nb2A-Cl5A  | 96.1(3)   |
| Nb3B-O6B  | 1.716(8)     | O6A-Nb2A-Cl6A  | 102.5(3)  |
| Nb3B-O2C  | 1.914(7)     | O6A-Nb2A-O5A   | 94.1(3)   |
| Cl4A-C5A  | 1.728(9)     | O6A-Nb2A-O4A   | 163.4(3)  |
| Cl4B-C5B  | 1.724(10)    | O6A-Nb2A-O2C   | 103.1(4)  |
| Cl3A-C2A  | 1.713(10)    | O2C-Nb2A-Cl5A  | 160.3(2)  |
| Cl3B-C2B  | 1.747(10)    | O2C-Nb2A-Cl6A  | 91.9(3)   |
| O5A-C4A   | 1.278(12)    | O2C-Nb2A-O5A   | 89.2(3)   |
| O4A-C3A   | 1.253(12)    | O2C-Nb2A-O4A   | 83.0(3)   |
| O2A-C1A   | 1.278(11)    | Cl2A-Nb1A-Cl1A | 88.97(12) |
| O3A-C6A   | 1.241(12)    | Cl2A-Nb1A-O3A  | 88.9(2)   |
| O5B-C4B   | 1.248(12)    | O2A-Nb1A-Cl1A  | 80.6(2)   |
| O3B-C6B   | 1.269(12)    | O2A-Nb1A-Cl2A  | 158.5(2)  |
| O4B-C3B   | 1.279(12)    | O2A-Nb1A-O3A   | 70.9(3)   |
| O2B-C1B   | 1.237(12)    | O3A-Nb1A-Cl1A  | 80.18(19) |
| N6D-C35D  | 1.528(14)    | O1A-Nb1A-Cl1A  | 97.5(3)   |
| N6D-C33D  | 1.530(13)    | O1A-Nb1A-Cl2A  | 102.5(3)  |
| N6D-C31D  | 1.525(14)    | O1A-Nb1A-O2A   | 97.6(3)   |
| N6D-C29D  | 1.532(19)    | O1A-Nb1A-O3A   | 168.4(3)  |
| N5D-C27D  | 1.521(15)    | O1A-Nb1A-O1C   | 100.9(4)  |
| N5D-C25D  | 1.517(14)    | O1C-Nb1A-Cl1A  | 159.6(2)  |
| N5D-C23D  | 1.501(19)    | O1C-Nb1A-Cl2A  | 95.6(2)   |
| N5D-C21D  | 1.531(18)    | O1C-Nb1A-O2A   | 88.2(3)   |
| N3D-C7D   | 1.528(13)    | O1C-Nb1A-O3A   | 80.0(3)   |
| N3D-C11D  | 1.519(13)    | Cl6B-Nb3B-Cl5B | 89.36(12) |
| N3D-C9D   | 1.514(15)    | Cl6B-Nb3B-O5B  | 95.45(19) |
| N3D-C5D   | 1.520(15)    | O5B-Nb3B-Cl5B  | 76.84(19) |
| C1A-C2A   | 1.375(13)    | O4B-Nb3B-Cl5B  | 83.8(2)   |
| C1A-C6A   | 1.543(13)    | O4B-Nb3B-Cl6B  | 164.8(2)  |
| C5A-C4A   | 1.362(13)    | O4B-Nb3B-O5B   | 69.8(3)   |

|           |           |               |           |
|-----------|-----------|---------------|-----------|
| C5A-C6A   | 1.424(13) | O6B-Nb3B-Cl5B | 99.5(3)   |
| C2A-C3A   | 1.417(14) | O6B-Nb3B-Cl6B | 100.5(3)  |
| C5B-C4B   | 1.426(14) | O6B-Nb3B-O5B  | 163.6(3)  |
| C5B-C6B   | 1.379(14) | O6B-Nb3B-O4B  | 94.0(4)   |
| C4A-C3A   | 1.524(13) | O6B-Nb3B-O2C  | 102.1(4)  |
| C1B-C6B   | 1.539(13) | O2C-Nb3B-Cl5B | 157.3(3)  |
| C1B-C2B   | 1.405(14) | O2C-Nb3B-Cl6B | 93.5(3)   |
| C4B-C3B   | 1.527(14) | O2C-Nb3B-O5B  | 80.5(3)   |
| C30D-C29D | 1.520(19) | O2C-Nb3B-O4B  | 87.8(3)   |
| C2B-C3B   | 1.359(14) | C4A-O5A-Nb2A  | 123.2(6)  |
| C7D-C8D   | 1.541(16) | C3A-O4A-Nb2A  | 115.4(6)  |
| C11D-C12D | 1.499(14) | C1A-O2A-Nb1A  | 122.7(6)  |
| C35D-C36D | 1.507(18) | C6A-O3A-Nb1A  | 115.1(6)  |
| N4D-C17D  | 1.53(2)   | C4B-O5B-Nb3B  | 114.9(7)  |
| N4D-C19D  | 1.52(2)   | C6B-O3B-Nb2B  | 123.9(6)  |
| N4D-C15D  | 1.53(2)   | C3B-O4B-Nb3B  | 124.4(7)  |
| N4D-C13D  | 1.47(2)   | C1B-O2B-Nb2B  | 115.5(6)  |
| C28D-C27D | 1.525(18) | C35D-N6D-C33D | 109.6(9)  |
| C33D-C34D | 1.514(19) | C35D-N6D-C29D | 106.7(9)  |
| C1D-N1D   | 1.15(2)   | C33D-N6D-C29D | 110.7(10) |
| C1D-C2D   | 1.42(3)   | C31D-N6D-C35D | 111.8(9)  |
| C9D-C10D  | 1.51(2)   | C31D-N6D-C33D | 105.4(9)  |
| C6D-C5D   | 1.52(2)   | C31D-N6D-C29D | 112.7(10) |
| C31D-C32D | 1.521(17) | C27D-N5D-C21D | 112.1(10) |
| C14D-C13D | 1.505(19) | C25D-N5D-C27D | 107.2(9)  |
| C25D-C26D | 1.528(19) | C25D-N5D-C21D | 107.3(10) |
| C23D-C24D | 1.52(2)   | C23D-N5D-C27D | 108.8(10) |
| C17D-C18D | 1.45(2)   | C23D-N5D-C25D | 110.8(10) |
| C19D-C20D | 1.55(2)   | C23D-N5D-C21D | 110.6(11) |
| C21D-C22D | 1.50(2)   | Nb2B-O1C-Nb1A | 177.6(5)  |
| N2D-C3D   | 1.14(2)   | Nb2A-O2C-Nb3B | 175.6(5)  |
| C15D-C16D | 1.53(2)   | C11D-N3D-C7D  | 106.4(8)  |
| C3D-C4D   | 1.46(2)   | C11D-N3D-C5D  | 112.1(9)  |
|           |           | C9D-N3D-C7D   | 111.6(9)  |
|           |           | C9D-N3D-C11D  | 111.1(9)  |
|           |           | C9D-N3D-C5D   | 105.1(9)  |
|           |           | C5D-N3D-C7D   | 110.5(9)  |
|           |           | O2A-C1A-C2A   | 125.5(9)  |
|           |           | O2A-C1A-C6A   | 115.1(8)  |
|           |           | C2A-C1A-C6A   | 119.4(8)  |
|           |           | C4A-C5A-Cl4A  | 121.0(7)  |
|           |           | C4A-C5A-C6A   | 121.2(9)  |
|           |           | C6A-C5A-Cl4A  | 117.8(7)  |
|           |           | C1A-C2A-Cl3A  | 120.2(8)  |
|           |           | C1A-C2A-C3A   | 120.2(9)  |
|           |           | C3A-C2A-Cl3A  | 119.5(7)  |
|           |           | C4B-C5B-Cl4B  | 119.1(8)  |
|           |           | C6B-C5B-Cl4B  | 120.2(8)  |
|           |           | C6B-C5B-C4B   | 120.6(9)  |
|           |           | O5A-C4A-C5A   | 124.4(9)  |
|           |           | O5A-C4A-C3A   | 116.3(8)  |
|           |           | C5A-C4A-C3A   | 119.3(8)  |
|           |           | O4A-C3A-C2A   | 124.7(9)  |
|           |           | O4A-C3A-C4A   | 114.7(8)  |
|           |           | C2A-C3A-C4A   | 120.5(8)  |

---

|               |           |
|---------------|-----------|
| O2B-C1B-C6B   | 115.5(8)  |
| O2B-C1B-C2B   | 125.8(9)  |
| C2B-C1B-C6B   | 118.7(9)  |
| O3A-C6A-C1A   | 115.9(8)  |
| O3A-C6A-C5A   | 124.9(9)  |
| C5A-C6A-C1A   | 119.2(8)  |
| O5B-C4B-C5B   | 123.6(10) |
| O5B-C4B-C3B   | 116.5(9)  |
| C5B-C4B-C3B   | 119.8(9)  |
| O3B-C6B-C5B   | 126.0(9)  |
| O3B-C6B-C1B   | 114.7(8)  |
| C5B-C6B-C1B   | 119.3(9)  |
| C1B-C2B-C13B  | 118.1(7)  |
| C3B-C2B-C13B  | 118.9(8)  |
| C3B-C2B-C1B   | 122.9(9)  |
| N3D-C7D-C8D   | 114.5(10) |
| C12D-C11D-N3D | 114.2(9)  |
| C36D-C35D-N6D | 116.3(10) |
| C19D-N4D-C17D | 111.3(13) |
| C19D-N4D-C15D | 102.4(13) |
| C15D-N4D-C17D | 111.2(13) |
| C13D-N4D-C17D | 108.2(14) |
| C13D-N4D-C19D | 113.6(13) |
| C13D-N4D-C15D | 110.0(13) |
| O4B-C3B-C4B   | 114.2(9)  |
| O4B-C3B-C2B   | 127.2(10) |
| C2B-C3B-C4B   | 118.6(9)  |
| C34D-C33D-N6D | 116.0(10) |
| N1D-C1D-C2D   | 179(2)    |
| C10D-C9D-N3D  | 114.6(11) |
| C32D-C31D-N6D | 113.5(11) |
| N3D-C5D-C6D   | 114.3(10) |
| N5D-C27D-C28D | 116.1(10) |
| C30D-C29D-N6D | 114.4(11) |
| N5D-C25D-C26D | 116.0(11) |
| N5D-C23D-C24D | 116.8(13) |
| C18D-C17D-N4D | 119.1(15) |
| N4D-C19D-C20D | 115.1(14) |
| C22D-C21D-N5D | 112.2(14) |
| C16D-C15D-N4D | 112.3(14) |
| N2D-C3D-C4D   | 180(2)    |
| N4D-C13D-C14D | 117.7(14) |

---

**Table S14 Anisotropic displacement parameters ( $\text{\AA}^2 \times 10^3$ ) for  $(\text{Et}_4\text{N})_4[\text{Nb}_4\text{O}_4(\text{ca})_2(\mu^2\text{-O})_2\text{Cl}_8]\cdot 2\text{CH}_3\text{CN}$  (6). The anisotropic displacement factor exponent takes the form:  $-2\pi^2[\text{h}^2\text{a}^{*2}\text{U}^{11} + \dots + 2\text{h k a}^* \text{b}^* \text{U}^{12}]$ .**

| Atoms | U <sub>11</sub> | U <sub>22</sub> | U <sub>33</sub> | U <sub>23</sub> | U <sub>13</sub> | U <sub>12</sub> |
|-------|-----------------|-----------------|-----------------|-----------------|-----------------|-----------------|
| Nb2B  | 15.8(4)         | 14.3(4)         | 20.7(4)         | -0.7(3)         | 0.3(3)          | -2.6(3)         |
| Nb2A  | 15.4(4)         | 18.3(4)         | 14.4(4)         | 0.8(3)          | 0.2(3)          | 1.8(3)          |
| Nb1A  | 14.9(4)         | 19.8(4)         | 15.5(4)         | -0.9(3)         | -0.2(3)         | -4.4(3)         |
| Nb3B  | 15.6(4)         | 23.3(5)         | 19.3(4)         | -1.9(4)         | 0.4(3)          | 3.3(3)          |
| Cl4A  | 16.9(11)        | 17.0(11)        | 30.1(13)        | 5.7(9)          | -2.3(9)         | -5.9(9)         |
| Cl4B  | 28.6(13)        | 16.6(11)        | 25.6(12)        | 3.9(9)          | 0.6(10)         | -9.2(10)        |
| Cl3A  | 25.3(12)        | 14.5(11)        | 23.8(12)        | 2.4(9)          | -1.9(9)         | -9.4(9)         |
| Cl3B  | 21.9(12)        | 15.1(11)        | 31.5(13)        | 3.3(10)         | -5.1(10)        | -6.5(9)         |
| Cl5A  | 16.2(11)        | 22.2(12)        | 27.9(12)        | -5.1(10)        | 4.7(9)          | -1.0(9)         |
| Cl6A  | 30.1(13)        | 18.2(12)        | 30.8(14)        | -6.1(10)        | -10.3(11)       | 2.2(10)         |
| Cl1B  | 29.7(14)        | 26.6(14)        | 33.2(14)        | 11.7(11)        | 1.0(11)         | -0.7(11)        |
| Cl2B  | 20.4(12)        | 24.9(13)        | 45.4(16)        | -4.6(12)        | 11.9(11)        | -0.5(10)        |
| Cl1A  | 23.8(13)        | 37.9(16)        | 36.2(15)        | -7.6(13)        | 1.6(11)         | 6.7(12)         |
| Cl2A  | 40.7(16)        | 32.7(16)        | 30.2(14)        | -13.6(12)       | 2.2(12)         | -15.9(13)       |
| Cl5B  | 21.9(13)        | 50.2(19)        | 40.1(16)        | -8.2(14)        | -1.0(11)        | 13.6(13)        |
| Cl6B  | 33.7(15)        | 49.4(19)        | 27.9(14)        | 11.4(13)        | 3.5(11)         | -3.5(14)        |
| O5A   | 12(3)           | 20(4)           | 19(3)           | 3(3)            | -1(3)           | -1(3)           |
| O4A   | 27(4)           | 14(3)           | 15(3)           | -4(3)           | -3(3)           | -4(3)           |
| O2A   | 27(4)           | 20(4)           | 13(3)           | 1(3)            | -3(3)           | -5(3)           |
| O3A   | 16(3)           | 20(4)           | 25(4)           | 2(3)            | -4(3)           | -3(3)           |
| O5B   | 14(3)           | 23(4)           | 20(3)           | 5(3)            | -4(3)           | -5(3)           |
| O3B   | 27(4)           | 14(3)           | 22(4)           | 1(3)            | 4(3)            | -4(3)           |
| O4B   | 18(3)           | 20(4)           | 22(4)           | 2(3)            | -3(3)           | 0(3)            |
| O2B   | 20(3)           | 14(3)           | 20(3)           | 2(3)            | 2(3)            | -8(3)           |
| O1B   | 23(4)           | 28(4)           | 27(4)           | 1(3)            | -7(3)           | 2(3)            |
| N6D   | 20(4)           | 18(4)           | 27(5)           | -7(4)           | 2(3)            | -6(3)           |
| N5D   | 18(4)           | 15(4)           | 32(5)           | 4(4)            | 3(3)            | 2(3)            |
| O1A   | 27(4)           | 31(4)           | 18(4)           | 5(3)            | -4(3)           | -7(3)           |
| O6B   | 30(4)           | 22(4)           | 37(5)           | -9(3)           | -6(3)           | -2(3)           |
| O1C   | 21(4)           | 25(4)           | 21(4)           | -2(3)           | 0(3)            | -1(3)           |
| O6A   | 32(4)           | 22(4)           | 27(4)           | 7(3)            | 5(3)            | 2(3)            |
| O2C   | 20(4)           | 31(4)           | 25(4)           | 2(3)            | 5(3)            | 9(3)            |
| N3D   | 23(4)           | 12(4)           | 33(5)           | -4(4)           | 2(4)            | -7(3)           |
| C1A   | 11(4)           | 14(4)           | 17(4)           | 1(3)            | 3(3)            | 0(3)            |
| C5A   | 8(4)            | 10(4)           | 23(5)           | 2(3)            | 2(3)            | -2(3)           |
| C2A   | 9(4)            | 16(4)           | 22(5)           | -3(4)           | 0(3)            | -3(3)           |
| C5B   | 13(4)           | 12(4)           | 29(5)           | 0(4)            | 6(4)            | -1(3)           |
| C4A   | 8(4)            | 15(4)           | 21(5)           | 5(4)            | 2(3)            | 2(3)            |
| C3A   | 11(4)           | 15(4)           | 18(4)           | -1(3)           | 2(3)            | 4(3)            |
| C1B   | 11(4)           | 14(4)           | 25(5)           | -2(4)           | 1(3)            | -2(3)           |
| C6A   | 8(4)            | 12(4)           | 20(4)           | -2(3)           | 2(3)            | 2(3)            |
| C4B   | 8(4)            | 23(5)           | 22(5)           | -2(4)           | 2(3)            | 4(4)            |
| C6B   | 11(4)           | 8(4)            | 22(5)           | 0(3)            | 4(3)            | -3(3)           |
| C30D  | 27(6)           | 23(6)           | 34(6)           | 1(5)            | 1(5)            | 2(5)            |
| C2B   | 17(4)           | 9(4)            | 24(5)           | 5(4)            | 1(4)            | -3(3)           |

|      |         |        |         |         |        |         |
|------|---------|--------|---------|---------|--------|---------|
| C7D  | 12(4)   | 27(6)  | 34(6)   | 0(5)    | 4(4)   | 0(4)    |
| C11D | 23(5)   | 5(4)   | 35(6)   | -1(4)   | 8(4)   | -3(4)   |
| C12D | 15(5)   | 39(7)  | 53(8)   | 4(6)    | 2(5)   | -5(5)   |
| C35D | 29(6)   | 22(6)  | 36(6)   | -6(5)   | -4(5)  | 1(5)    |
| N4D  | 66(6)   | 59(5)  | 51(5)   | 9(4)    | -8(4)  | -9(4)   |
| C28D | 44(8)   | 30(7)  | 44(8)   | -10(6)  | 4(6)   | 4(6)    |
| C8D  | 22(5)   | 41(7)  | 39(7)   | 4(6)    | 7(5)   | 11(5)   |
| C3B  | 15(4)   | 17(5)  | 23(5)   | -1(4)   | 1(4)   | 3(4)    |
| C36D | 45(7)   | 37(7)  | 27(6)   | -14(5)  | -3(5)  | -8(6)   |
| C33D | 30(6)   | 37(7)  | 24(5)   | -3(5)   | 6(4)   | -16(5)  |
| C1D  | 77(12)  | 63(11) | 26(7)   | 8(7)    | 5(7)   | 30(9)   |
| C9D  | 41(7)   | 33(7)  | 39(7)   | -14(6)  | 3(6)   | -16(6)  |
| C6D  | 46(8)   | 31(7)  | 42(7)   | 14(6)   | 16(6)  | 6(6)    |
| C31D | 33(6)   | 28(6)  | 26(6)   | -6(5)   | 6(5)   | 2(5)    |
| C5D  | 36(7)   | 14(5)  | 52(8)   | 4(5)    | 17(6)  | -4(5)   |
| C27D | 34(6)   | 21(6)  | 39(7)   | 2(5)    | 0(5)   | 1(5)    |
| C10D | 46(8)   | 62(10) | 37(7)   | -11(7)  | 2(6)   | 12(8)   |
| C29D | 48(3)   | 45(3)  | 58(4)   | -7(3)   | -11(3) | -15(3)  |
| C14D | 43(8)   | 28(7)  | 58(9)   | -17(6)  | -6(6)  | -3(6)   |
| C25D | 24(6)   | 35(7)  | 42(7)   | -4(5)   | -3(5)  | 5(5)    |
| C23D | 48(4)   | 50(5)  | 62(5)   | -10(4)  | 13(4)  | -13(4)  |
| C34D | 39(7)   | 45(8)  | 36(7)   | 5(6)    | 12(6)  | -3(6)   |
| C17D | 48(3)   | 45(3)  | 58(4)   | -7(3)   | -11(3) | -15(3)  |
| N1D  | 66(6)   | 59(5)  | 51(5)   | 9(4)    | -8(4)  | -9(4)   |
| C19D | 48(3)   | 45(3)  | 58(4)   | -7(3)   | -11(3) | -15(3)  |
| C21D | 48(4)   | 50(5)  | 62(5)   | -10(4)  | 13(4)  | -13(4)  |
| C32D | 34(7)   | 57(9)  | 35(7)   | -8(6)   | -1(5)  | -9(6)   |
| N2D  | 66(6)   | 59(5)  | 51(5)   | 9(4)    | -8(4)  | -9(4)   |
| C15D | 60(9)   | 42(8)  | 39(8)   | -6(6)   | -6(7)  | -4(7)   |
| C18D | 48(3)   | 45(3)  | 58(4)   | -7(3)   | -11(3) | -15(3)  |
| C2D  | 130(19) | 67(13) | 32(8)   | -5(8)   | 6(10)  | 33(13)  |
| C26D | 39(8)   | 44(8)  | 60(9)   | -13(7)  | -6(7)  | 17(7)   |
| C3D  | 63(10)  | 38(8)  | 47(8)   | 9(7)    | -12(7) | -19(7)  |
| C24D | 48(4)   | 50(5)  | 62(5)   | -10(4)  | 13(4)  | -13(4)  |
| C4D  | 48(10)  | 92(16) | 100(16) | -39(13) | 25(10) | -28(11) |
| C13D | 48(3)   | 45(3)  | 58(4)   | -7(3)   | -11(3) | -15(3)  |
| C22D | 48(4)   | 50(5)  | 62(5)   | -10(4)  | 13(4)  | -13(4)  |
| C20D | 48(3)   | 45(3)  | 58(4)   | -7(3)   | -11(3) | -15(3)  |
| C16D | 48(3)   | 45(3)  | 58(4)   | -7(3)   | -11(3) | -15(3)  |

**Table S15 Hydrogen coordinates ( $\times 10^4$ ) and isotropic displacement parameters ( $\text{\AA}^2 \times 10^3$ ) for  $(\text{Et}_4\text{N})_4[\text{Nb}_4\text{O}_4(\text{ca})_2(\mu^2\text{-O})_2\text{Cl}_8]\cdot 2\text{CH}_3\text{CN}$  (6).**

| Atoms | x       | y        | z       | U(eq) |
|-------|---------|----------|---------|-------|
| H30A  | 1324.77 | 984.55   | 2451.74 | 42    |
| H30B  | 1002.81 | -249.73  | 2631.51 | 42    |
| H30C  | 618.15  | 1029.27  | 2587.68 | 42    |
| H7DA  | 3737.54 | 8677.97  | 3542.74 | 29    |
| H7DB  | 3548.12 | 9009.55  | 3055.88 | 29    |
| H11A  | 4730.45 | 8099.15  | 3302.75 | 25    |
| H11B  | 4534.36 | 8502.84  | 2823.34 | 25    |
| H12A  | 5409.02 | 9826.1   | 2811.85 | 53    |
| H12B  | 5603.8  | 8395.17  | 2892.27 | 53    |
| H12C  | 5610.26 | 9361.96  | 3284.66 | 53    |
| H35A  | 692.21  | 23.16    | 1171.95 | 35    |
| H35B  | 15.14   | 378.54   | 1319.29 | 35    |
| H28A  | 1374.55 | -30.51   | 3468.12 | 59    |
| H28B  | 1748.17 | 1261.62  | 3512.59 | 59    |
| H28C  | 1006.72 | 1266.95  | 3498.77 | 59    |
| H8DA  | 3238.23 | 11071.34 | 3291.65 | 51    |
| H8DB  | 3364.62 | 10617.79 | 3776.04 | 51    |
| H8DC  | 2828.03 | 9973.07  | 3484.77 | 51    |
| H36A  | 168.42  | 1223.9   | 647.63  | 54    |
| H36B  | 770.72  | 1958.84  | 826.05  | 54    |
| H36C  | 100.31  | 2347.07  | 982.64  | 54    |
| H33A  | 1327.6  | 2453.42  | 1414.66 | 36    |
| H33B  | 1530.91 | 2066.71  | 1893.64 | 36    |
| H9DA  | 5059.4  | 10750.87 | 3619.93 | 45    |
| H9DB  | 4386.88 | 11067.1  | 3786.58 | 45    |
| H6DA  | 4010.18 | 11470.58 | 2351.2  | 59    |
| H6DB  | 3669.04 | 10266.7  | 2537.17 | 59    |
| H6DC  | 4355.51 | 10142.88 | 2366.17 | 59    |
| H31A  | 559.72  | 2710.39  | 2103.5  | 35    |
| H31B  | 333.72  | 3021.55  | 1621.21 | 35    |
| H5DA  | 4760.79 | 11324.34 | 2935.9  | 40    |
| H5DB  | 4082.49 | 11661.34 | 3087.73 | 40    |
| H27A  | 1045.03 | 118.41   | 4161.71 | 38    |
| H27B  | 1779.95 | 280.83   | 4180.27 | 38    |
| H10A  | 4947.15 | 8681.36  | 3918.71 | 72    |
| H10B  | 4336.53 | 9180.27  | 4138.27 | 72    |
| H10C  | 4996.73 | 9779.61  | 4267.82 | 72    |
| H29A  | 306.84  | -222.42  | 2013.57 | 61    |
| H29B  | 1008.81 | -501.94  | 1900.61 | 61    |
| H14A  | 4458.38 | 7712.86  | 5660.5  | 64    |
| H14B  | 4445.15 | 7079.89  | 6125.09 | 64    |
| H14C  | 4068.22 | 8347.03  | 6028.62 | 64    |
| H25A  | 372.07  | 1761.88  | 4282.45 | 40    |
| H25B  | 651.94  | 2596.74  | 3912.23 | 40    |
| H23A  | 1382.46 | 2426.11  | 4962.57 | 64    |
| H23B  | 1810.23 | 1253.31  | 4860.09 | 64    |

|      |         |          |         |     |
|------|---------|----------|---------|-----|
| H34A | 1703.52 | 608.89   | 1146.22 | 59  |
| H34B | 1808.97 | 35.09    | 1617.29 | 59  |
| H34C | 2234.78 | 1164.62  | 1463.55 | 59  |
| H17A | 2866.13 | 4909.79  | 5715.45 | 61  |
| H17B | 2911.72 | 5566.15  | 5259.58 | 61  |
| H19A | 4505.6  | 5047.36  | 5984.89 | 61  |
| H19B | 4165.12 | 3855.51  | 5774.69 | 61  |
| H21A | 1689.39 | 3166.89  | 3905.78 | 64  |
| H21B | 1760.65 | 3630.36  | 4393.12 | 64  |
| H32A | -526.55 | 1621.27  | 1708.11 | 63  |
| H32B | -543.86 | 2815.15  | 2018.09 | 63  |
| H32C | -316.07 | 1486.98  | 2203.36 | 63  |
| H15A | 4588.33 | 5929.74  | 5327.27 | 56  |
| H15B | 4261.79 | 4711.57  | 5121.89 | 56  |
| H18A | 3363.86 | 3750.39  | 5003.25 | 76  |
| H18B | 2672.88 | 3546.49  | 5157.44 | 76  |
| H18C | 3250.61 | 3100.54  | 5455.86 | 76  |
| H2DA | 1367.21 | 7755.9   | -206.63 | 114 |
| H2DB | 885.27  | 7644.63  | 168.51  | 114 |
| H2DC | 1605.18 | 7371.06  | 267.31  | 114 |
| H26A | 85.06   | 3875.11  | 4363.56 | 72  |
| H26B | 798.78  | 4276.36  | 4405.69 | 72  |
| H26C | 503.18  | 3439.3   | 4771.19 | 72  |
| H24A | 898.84  | -34.57   | 4825.53 | 80  |
| H24B | 510.39  | 1149.53  | 4979.66 | 80  |
| H24C | 1038.55 | 555.13   | 5290.87 | 80  |
| H4DA | 6412.63 | 9425.36  | 4825.15 | 119 |
| H4DB | 6405.55 | 9263.01  | 5334.83 | 119 |
| H4DC | 6011.05 | 10358.69 | 5104.52 | 119 |
| H13A | 3369.79 | 6723.37  | 6010.69 | 61  |
| H13B | 3414.15 | 7274.71  | 5538.18 | 61  |
| H22A | 2483.02 | 1709.92  | 4026.1  | 80  |
| H22B | 2541.58 | 2105.12  | 4520.79 | 80  |
| H22C | 2729.56 | 3077.2   | 4157.33 | 80  |
| H20A | 3375.3  | 3981.67  | 6279.76 | 76  |
| H20B | 3676.16 | 5234.47  | 6478.44 | 76  |
| H20C | 4033.22 | 3926.06  | 6533.02 | 76  |
| H16A | 4238.4  | 6453.66  | 4634.94 | 76  |
| H16B | 3812.3  | 7198.14  | 4957.45 | 76  |
| H16C | 3556.18 | 5956.12  | 4723.86 | 76  |

**Table S16 Torsion angles (°) for (Et<sub>4</sub>N)<sub>4</sub>[Nb<sub>4</sub>O<sub>4</sub>(ca)<sub>2</sub>(μ<sup>2</sup>-O)<sub>2</sub>Cl<sub>8</sub>].2CH<sub>3</sub>CN (6).**

| <b>Torsion angles</b> | <b>Angle (°)</b> | <b>Torsion angles</b> | <b>Angle (°)</b> |
|-----------------------|------------------|-----------------------|------------------|
| Nb2B-O3B-C6B-C5B      | -174.4(7)        | C4B-C5B-C6B-O3B       | -178.8(9)        |
| Nb2B-O3B-C6B-C1B      | 4.9(11)          | C4B-C5B-C6B-C1B       | 1.9(14)          |
| Nb2B-O2B-C1B-C6B      | -2.9(10)         | C6B-C5B-C4B-O5B       | 178.6(9)         |
| Nb2B-O2B-C1B-C2B      | 176.9(8)         | C6B-C5B-C4B-C3B       | -2.9(14)         |
| Nb2A-O5A-C4A-C5A      | -178.4(7)        | C6B-C1B-C2B-Cl3B      | 179.0(7)         |
| Nb2A-O5A-C4A-C3A      | 2.1(11)          | C6B-C1B-C2B-C3B       | 1.7(15)          |
| Nb2A-O4A-C3A-C2A      | 173.3(7)         | C2B-C1B-C6B-O3B       | 179.4(9)         |
| Nb2A-O4A-C3A-C4A      | -3.9(10)         | C2B-C1B-C6B-C5B       | -1.2(13)         |
| Nb1A-O2A-C1A-C2A      | -173.1(7)        | C7D-N3D-C11D-C12D     | -179.6(10)       |
| Nb1A-O2A-C1A-C6A      | 5.4(11)          | C7D-N3D-C9D-C10D      | 61.9(14)         |
| Nb1A-O3A-C6A-C1A      | -2.7(10)         | C7D-N3D-C5D-C6D       | -60.7(13)        |
| Nb1A-O3A-C6A-C5A      | 174.9(7)         | C11D-N3D-C7D-C8D      | -177.2(10)       |
| Nb3B-O5B-C4B-C5B      | 175.5(7)         | C11D-N3D-C9D-C10D     | -56.8(14)        |
| Nb3B-O5B-C4B-C3B      | -2.9(10)         | C11D-N3D-C5D-C6D      | 57.8(13)         |
| Nb3B-O4B-C3B-C4B      | 4.8(11)          | C35D-N6D-C33D-C34D    | -58.0(13)        |
| Nb3B-O4B-C3B-C2B      | -178.0(8)        | C35D-N6D-C31D-C32D    | 63.6(13)         |
| Cl4A-C5A-C4A-O5A      | -1.9(14)         | C35D-N6D-C29D-C30D    | -174.8(11)       |
| Cl4A-C5A-C4A-C3A      | 177.6(6)         | C33D-N6D-C35D-C36D    | -60.4(13)        |
| Cl4A-C5A-C6A-O3A      | 2.9(13)          | C33D-N6D-C31D-C32D    | -177.3(10)       |
| Cl4A-C5A-C6A-C1A      | -179.7(6)        | C33D-N6D-C29D-C30D    | 66.0(15)         |
| Cl4B-C5B-C4B-O5B      | -5.8(13)         | C9D-N3D-C7D-C8D       | 61.4(13)         |
| Cl4B-C5B-C4B-C3B      | 172.6(7)         | C9D-N3D-C11D-C12D     | -57.9(13)        |
| Cl4B-C5B-C6B-O3B      | 5.7(14)          | C9D-N3D-C5D-C6D       | 178.7(10)        |
| Cl4B-C5B-C6B-C1B      | -173.6(7)        | C31D-N6D-C35D-C36D    | 56.1(13)         |
| Cl3A-C2A-C3A-O4A      | -4.4(14)         | C31D-N6D-C33D-C34D    | -178.5(10)       |
| Cl3A-C2A-C3A-C4A      | 172.7(7)         | C31D-N6D-C29D-C30D    | -51.7(15)        |
| Cl3B-C2B-C3B-O4B      | 2.9(15)          | C5D-N3D-C7D-C8D       | -55.2(13)        |
| Cl3B-C2B-C3B-C4B      | -180.0(7)        | C5D-N3D-C11D-C12D     | 59.4(13)         |
| O5A-C4A-C3A-O4A       | 1.6(12)          | C5D-N3D-C9D-C10D      | -178.3(11)       |
| O5A-C4A-C3A-C2A       | -175.8(8)        | C27D-N5D-C25D-C26D    | 176.4(12)        |
| O2A-C1A-C2A-Cl3A      | 3.7(14)          | C27D-N5D-C23D-C24D    | -62.1(16)        |
| O2A-C1A-C2A-C3A       | -178.7(9)        | C27D-N5D-C21D-C22D    | -53.1(16)        |
| O2A-C1A-C6A-O3A       | -1.3(12)         | C29D-N6D-C35D-C36D    | 179.7(12)        |
| O2A-C1A-C6A-C5A       | -179.0(8)        | C29D-N6D-C33D-C34D    | 59.4(14)         |
| O5B-C4B-C3B-O4B       | -0.7(12)         | C29D-N6D-C31D-C32D    | -56.5(13)        |
| O5B-C4B-C3B-C2B       | -178.2(9)        | C25D-N5D-C27D-C28D    | 65.0(13)         |
| O2B-C1B-C6B-O3B       | -0.8(12)         | C25D-N5D-C23D-C24D    | 55.5(17)         |
| O2B-C1B-C6B-C5B       | 178.5(9)         | C25D-N5D-C21D-C22D    | -170.6(12)       |
| O2B-C1B-C2B-Cl3B      | -0.7(14)         | C23D-N5D-C27D-C28D    | -175.1(11)       |
| O2B-C1B-C2B-C3B       | -178.0(10)       | C23D-N5D-C25D-C26D    | 57.8(15)         |
| C1A-C2A-C3A-O4A       | 177.9(9)         | C23D-N5D-C21D-C22D    | 68.5(16)         |
| C1A-C2A-C3A-C4A       | -5.0(13)         | C17D-N4D-C19D-C20D    | -61.3(18)        |
| C5A-C4A-C3A-O4A       | -178.0(9)        | C17D-N4D-C15D-C16D    | 59.5(17)         |
| C5A-C4A-C3A-C2A       | 4.6(13)          | C17D-N4D-C13D-C14D    | -177.8(14)       |
| C2A-C1A-C6A-O3A       | 177.3(9)         | C19D-N4D-C17D-C18D    | -59(2)           |
| C2A-C1A-C6A-C5A       | -0.4(13)         | C19D-N4D-C15D-C16D    | 178.5(12)        |
| C5B-C4B-C3B-O4B       | -179.2(9)        | C19D-N4D-C13D-C14D    | 58(2)            |
| C5B-C4B-C3B-C2B       | 3.3(13)          | C21D-N5D-C27D-C28D    | -52.4(15)        |
| C4A-C5A-C6A-O3A       | -177.3(9)        | C21D-N5D-C25D-C26D    | -63.1(15)        |
| C4A-C5A-C6A-C1A       | 0.1(13)          | C21D-N5D-C23D-C24D    | 174.4(14)        |
| C1B-C2B-C3B-O4B       | -179.8(10)       | C15D-N4D-C17D-C18D    | 54(2)            |

|                  |           |                    |           |
|------------------|-----------|--------------------|-----------|
| C1B-C2B-C3B-C4B  | -2.7(15)  | C15D-N4D-C19D-C20D | 179.8(12) |
| C6A-C1A-C2A-C13A | -174.8(7) | C15D-N4D-C13D-C14D | -56.1(19) |
| C6A-C1A-C2A-C3A  | 2.9(13)   | C13D-N4D-C17D-C18D | 175.4(15) |
| C6A-C5A-C4A-O5A  | 178.3(9)  | C13D-N4D-C19D-C20D | 61.2(18)  |
| C6A-C5A-C4A-C3A  | -2.1(13)  | C13D-N4D-C15D-C16D | -60.4(17) |

Table S17 General hydrogen-bond distances and angles for (Et<sub>4</sub>N)<sub>4</sub>[Nb<sub>4</sub>O<sub>4</sub>(ca)<sub>2</sub>(μ<sup>2</sup>-O)<sub>2</sub>Cl<sub>8</sub>]·2CH<sub>3</sub>CN (6).

| Interactions | D-H...A                      | D-H (Å) | H...A (Å) | D...A (Å) | D-H...A (°) |
|--------------|------------------------------|---------|-----------|-----------|-------------|
| I            | C13-H13B...Cl10 <sup>a</sup> | 0.98    | 2.81      | 3.721(12) | 156         |
| II           | C14-H14B...O3 <sup>b</sup>   | 0.99    | 2.60      | 3.535(14) | 158         |
| III          | C18-H8A...O9                 | 0.99    | 2.54      | 3.288(16) | 132         |
| IV           | C19-H19B...Cl9               | 0.99    | 2.67      | 3.655(13) | 173         |
| V            | C22-H22A...O10 <sup>c</sup>  | 0.99    | 2.42      | 3.388(14) | 167         |
| VI           | C34-H34A...Cl9               | 0.99    | 2.72      | 3.568(13) | 144         |
| VII          | C35-H35B...O11 <sup>c</sup>  | 0.99    | 2.35      | 3.060(16) | 128         |
| VIII         | C41-H41C...Cl7 <sup>d</sup>  | 0.98    | 2.75      | 3.715(19) | 169         |
| IX           | C43-H43A...Cl8 <sup>c</sup>  | 0.99    | 2.81      | 3.605(17) | 137         |
| X            | C46-H46B...Cl8               | 0.98    | 2.71      | 3.650 (2) | 161         |
| XI           | C46-H46C...Cl11 <sup>e</sup> | 0.98    | 2.60      | 3.574(16) | 176         |
| XII          | C47-H47B...Cl7 <sup>f</sup>  | 0.98    | 2.76      | 3.640(2)  | 150         |
| XIII         | C47-H47B...Cl8 <sup>f</sup>  | 0.98    | 2.79      | 3.540(2)  | 134         |

Symmetry code: (a) -x + 1, y - 1/2, -z + 1/2 (b) x, y -1, z (c), 1-x, y + 1/2, 1/2 - z  
(d), 1 - x, y + 1/2 + 1, 1/2 - z (e), x, -y + 1/2, z - 1/2 (f), x, -y + 1/2, z + 1/2

**Table S18 Temperature and [DMAP] dependence of the *pseudo* first-order reaction between *cis*-[NbO(ca)<sub>2</sub>(H<sub>2</sub>O)OPPh<sub>3</sub>]<sup>-</sup> and 4-(dimethylamino)pyridine. [Nb] = 1.0 x 10<sup>-3</sup> M, λ = 430 nm, MeCN.**

| 10 <sup>-3</sup> k <sub>obs</sub> (s <sup>-1</sup> ) |          |          |           |           |
|------------------------------------------------------|----------|----------|-----------|-----------|
| [DMAP] M                                             | 15.5 °C  | 24.5 °C  | 31.2 °C   | 45.9 °C   |
| 0.05                                                 | 0.990(6) | 1.203(8) | 1.904(7)  | 5.433(4)  |
| 0.15                                                 | 1.522(9) | 2.497(7) | 3.902(6)  | 11.895(1) |
| 0.25                                                 | 2.216(3) | 3.726(5) | 5.945(2)  | 17.503(9) |
| 0.35                                                 | 2.989(5) | 4.906(1) | 7.679(3)  | 23.585(6) |
| 0.50                                                 | 3.931(9) | 7.031(8) | 11.155(4) | 31.132(7) |

**Table S19 Substituent dependence of the *pseudo* first-order reaction between *cis*-[NbO(ca)<sub>2</sub>(H<sub>2</sub>O)OPPh<sub>3</sub>]<sup>-</sup> and pyridine derivative ligands (Py). [Nb] = 1.0 x 10<sup>-3</sup> M, λ = 430 nm, 31.2 °C, MeCN.**

| 10 <sup>-3</sup> k <sub>obs</sub> (s <sup>-1</sup> ) |          |           |          |          |          |
|------------------------------------------------------|----------|-----------|----------|----------|----------|
| [Py] M                                               | py       | DMAP      | 4Mepy    | 3Clpy    | 3Brpy    |
| 0.05                                                 | 1.271(1) | 1.904(7)  | 1.027(6) | 0.892(4) | 0.777(8) |
| 0.15                                                 | 1.416(4) | 3.902(6)  | 1.202(5) | 1.033(2) | 0.887(7) |
| 0.25                                                 | 1.568(2) | 5.945(2)  | 1.413(6) | 1.232(2) | 1.043(6) |
| 0.35                                                 | 1.663(9) | 7.679(3)  | 1.599(4) | 1.438(2) | 1.194(8) |
| 0.50                                                 | 1.869(3) | 11.155(8) | 1.828(9) | 1.790(4) | 1.431(9) |
